# Supplementary material for: Emergence of social cluster by collective pairwise encounters in Drosophila
Source: eLife. 2020 Jan 21;9:e51921. doi: 10.7554/eLife.51921 (PMC6989122; doi:10.7554/eLife.51921)
Supplement: Figure 2—figure supplement 5—source data 1. [file elife-51921-fig2-figsupp5-data1.xlsx]

## Sheet: Figure 2-figure-S5B-Source Data
50f_d90	50f_d120	50f_d170	50m_d90	50m_d120	50m_d170
73.91	67.27	92.73	68.89	77.97	83.02
86.67	63.46	60	96.08	64.29	70.18
42.22	49.02	50.94	88	56.86	51.02
77.27	79.25	53.85	45.95	69.23	85.45
79.59	83.61	68	53.33	55.56	84.91
81.25	67.39	71.19	89.58	75.93	87.76
74.51	30	71.19	72.92	28	71.7
53.19	73.33	64.71	62.75	52.73	64
56.25	70.37	89.36	68.75	30	55.77
56	88.68	71.93	73.33	79.25	72.73
41.67	66.04	50	68.63	85.19	73.58
89.8	55.1	84.48	76.92	90.57	73.58
66.67	81.48	20.41	60.78	50.94	82.61
72.73	63.46		82.35	81.82	84.62
72.55	83.05		56	84	74.55
86.21	69.23		52.94	64.58	85.96
65.96	45.28		72.34	63.64	61.36
82.46			80.77	55.1	63.16
41.18			84	81.03	63.16
59.65			69.39	90.74
				90.2
				90.2
				92.73

## Sheet: Figure 2-S5B-Summary statistics
Table Analyzed	SSI_dish size_female										Table Analyzed	SSI_dish size_male
Data sets analyzed	A : 50f_d90	B : 50f_d120	C : 50f_d170								Data sets analyzed	D : 50m_d90	E : 50m_d120	F : 50m_d170
ANOVA summary											ANOVA summary
F	0.106										F	0.2202
P value	0.8997										P value	0.803
P value summary	ns										P value summary	ns
Significant diff. among means (P < 0.05)?	No										Significant diff. among means (P < 0.05)?	No
R square	0.004489										R square	0.007409
Brown-Forsythe test											Brown-Forsythe test
F (DFn, DFd)	0.243 (2, 47)										F (DFn, DFd)	2.797 (2, 59)
P value	0.7852										P value	0.0691
P value summary	ns										P value summary	ns
Are SDs significantly different (P < 0.05)?	No										Are SDs significantly different (P < 0.05)?	No
Bartlett's test											Bartlett's test
Bartlett's statistic (corrected)	0.9218										Bartlett's statistic (corrected)	5.71
P value	0.6307										P value	0.0576
P value summary	ns										P value summary	ns
Are SDs significantly different (P < 0.05)?	No										Are SDs significantly different (P < 0.05)?	No
ANOVA table	SS	DF	MS	F (DFn, DFd)	P value						ANOVA table	SS	DF	MS	F (DFn, DFd)	P value
Treatment (between columns)	57.36	2	28.68	F (2, 47) = 0.106	P=0.8997						Treatment (between columns)	99.92	2	49.96	F (2, 59) = 0.2202	P=0.8030
Residual (within columns)	12721	47	270.7								Residual (within columns)	13386	59	226.9
Total	12778	49									Total	13486	61
Data summary											Data summary
Number of treatments (columns)	3										Number of treatments (columns)	3
Number of values (total)	50										Number of values (total)	62
Number of families	1										Number of families	1
Number of comparisons per family	3										Number of comparisons per family	3
Alpha	0.05										Alpha	0.05
Tukey's multiple comparisons test	Mean Diff.	95.00% CI of diff.	Significant?	Summary	Adjusted P Value						Tukey's multiple comparisons test	Mean Diff.	95.00% CI of diff.	Significant?	Summary	Adjusted P Value
50f_d90 vs. 50f_d120	1.162	-11.97 to 14.3	No	ns	0.975	A-B					50m_d90 vs. 50m_d120	1.161	-9.912 to 12.23	No	ns	0.9656	D-E
50f_d90 vs. 50f_d170	2.695	-11.49 to 16.88	No	ns	0.8902	A-C					50m_d90 vs. 50m_d170	-1.927	-13.53 to 9.675	No	ns	0.916	D-F
50f_d120 vs. 50f_d170	1.533	-13.14 to 16.2	No	ns	0.9654	B-C					50m_d120 vs. 50m_d170	-3.087	-14.31 to 8.14	No	ns	0.7868	E-F
Test details	Mean 1	Mean 2	Mean Diff.	SE of diff.	n1	n2	q	DF			Test details	Mean 1	Mean 2	Mean Diff.	SE of diff.	n1	n2	q	DF
50f_d90 vs. 50f_d120	67.99	66.82	1.162	5.427	20	17	0.3029	47			50m_d90 vs. 50m_d120	71.19	70.02	1.161	4.605	20	23	0.3564	59
50f_d90 vs. 50f_d170	67.99	65.29	2.695	5.861	20	13	0.6504	47			50m_d90 vs. 50m_d170	71.19	73.11	-1.927	4.825	20	19	0.5646	59
50f_d120 vs. 50f_d170	66.82	65.29	1.533	6.061	17	13	0.3577	47			50m_d120 vs. 50m_d170	70.02	73.11	-3.087	4.67	23	19	0.935	59

## Sheet: Figure 2-figure-S5C-Source Data
	CS Female										CS Male
Fly number
5	14.4696	9.2538	13.7724	16.2582	16.2677						7.47267	11.065	22.825	26.0957	5.73077
10	8.40996	9.02072	7.40517	9.414	7.70076	8.94799					8.49025	8.75831	5.36973	8.26966	7.9989	7.40086
20	7.46984	4.31033	7.98417	7.84928	4.84365	7.62955	6.95969	4.33886			4.61497	4.53024	4.89009	5.91077	6.12547	5.62467	4.93367	5.22774
30	6.04148	5.71576	3.60213	5.40199	3.93363	5.87118	4.96356	6.18448			5.62852	5.60149	4.22338	5.06539	4.54622	5.06934	5.23533	4.94216
40	4.0604	4.48281	3.8117	4.28379							4.33735	4.29601	4.91661	5.41211
50	5.08266	4.59618	4.73663	4.50008	5.28134	5.62009	3.18595	3.48784			5.57509	4.21714	4.30344	4.69231	4.43219	5.18544	2.98152	3.31005
60	3.90991	4.15603	4.15966	3.68311							3.69241	4.12711	4.38677	3.71177
70	4.26905	3.57982	4.06497								4.05121	4.20412	4.504
80	4.03576	3.95827	3.86495	3.79335							3.48669	3.72685	3.9386	4.18017
90	4.04311	4.08949	4.10411	3.97442							3.3002	3.60058	3.73534	3.9212
100	3.9182	3.60179	4.19141								3.62903	3.34362	3.65401
