# Supplementary material for: Emergence of social cluster by collective pairwise encounters in Drosophila
Source: eLife. 2020 Jan 21;9:e51921. doi: 10.7554/eLife.51921 (PMC6989122; doi:10.7554/eLife.51921)
Supplement: Figure 2—figure supplement 8—source data 1. [file elife-51921-fig2-figsupp8-data1.xlsx]

## Sheet: Figure 2-figure-S8A-Source Data
CS_f	CS_f_Isolated	CS_m	CS_m_Isolated
52	67.57	74.51	70.21
47.73	61.7	74.29	54.35
48.89	35.9	85.71	40
48	-2.27	70	47.83
72.73	-12.73	58	60
64	2.13	48	-34
60	5.88	72.55	-32.35
66.67	-4	62.75	-38.71
72.73	0	76.47	17
72.55	-48.78	52	41.67
86.21		61.22	0
65.96		65.38

## Sheet: Figure 2-S8A-Summary statistics
Table Analyzed	SSI_Social experience			Table Analyzed	SSI_Social experience
Column B	CS_f_Isolated			Column D	CS_m_Isolated
vs.	vs.			vs.	vs.
Column A	CS_f			Column C	CS_m
Unpaired t test				Unpaired t test
P value	<0.0001			P value	0.001
P value summary	****			P value summary	**
Significantly different (P < 0.05)?	Yes			Significantly different (P < 0.05)?	Yes
One- or two-tailed P value?	Two-tailed			One- or two-tailed P value?	Two-tailed
t, df	t=4.858 df=20			t, df	t=3.805 df=21
How big is the difference?				How big is the difference?
Mean ± SEM of column A	63.12 ± 3.514, n=12			Mean ± SEM of column C	66.74 ± 3.15, n=12
Mean ± SEM of column B	10.54 ± 11.13, n=10			Mean ± SEM of column D	20.55 ± 12.23, n=11
Difference between means	-52.58 ± 10.82			Difference between means	-46.19 ± 12.14
95% confidence interval	-75.16 to -30			95% confidence interval	-71.44 to -20.95
R squared (eta squared)	0.5413			R squared (eta squared)	0.4081
F test to compare variances				F test to compare variances
F, DFn, Dfd	8.365, 9, 11			F, DFn, Dfd	13.82, 10, 11
P value	0.0018			P value	0.0001
P value summary	**			P value summary	***
Significantly different (P < 0.05)?	Yes			Significantly different (P < 0.05)?	Yes

## Sheet: Figure 2-figure-S8B-Source Data
CS_f_3d	CS_f_10d	CS_f_30d			CS_m_3d	CS_m_10d	CS_m_30d
42.86	82.14	52.94			50	58.18	6
66.67	60	26.09			90.38	70.21	35.14
76.47	60	50			82.61	73.91	23.4
77.78	46	59.18			64.15	58.18	40
64.81	56.25	44			84.62	70	40.43
55.1	78.57	68.09			77.08	58	52
30.61	51.06	57.45			58.54	48	39.58
85.19	50	58.33			78.72	68.75	69.39
66.67	65.22	8.51			68.89	85.11	42.22
72.73	41.18	26.32			91.67	79.25	47.83
72.55	59.65				60.78	70.37	51.02
86.21	72.55				85.71	58.82

## Sheet: Figure 2-S8B-Summary statistics
Table Analyzed	SSI_age			Table Analyzed	SSI_age			Table Analyzed	SSI_age			Table Analyzed	SSI_age
Column B	CS_f_10d			Column C	CS_f_30d			Column G	CS_m_10d			Column H	CS_m_30d
vs.	vs.			vs.	vs.			vs.	vs.			vs.	vs.
Column A	CS_f_3d			Column A	CS_f_3d			Column F	CS_m_3d			Column F	CS_m_3d
Unpaired t test				Unpaired t test				Unpaired t test				Unpaired t test
P value	0.3102			P value	0.0103			P value	0.1283			P value	<0.0001
P value summary	ns			P value summary	*			P value summary	ns			P value summary	****
Significantly different (P < 0.05)?	No			Significantly different (P < 0.05)?	Yes			Significantly different (P < 0.05)?	No			Significantly different (P < 0.05)?	Yes
One- or two-tailed P value?	Two-tailed			One- or two-tailed P value?	Two-tailed			One- or two-tailed P value?	Two-tailed			One- or two-tailed P value?	Two-tailed
t, df	t=1.039 df=22			t, df	t=2.833 df=20			t, df	t=1.58 df=22			t, df	t=5.415 df=21
How big is the difference?				How big is the difference?				How big is the difference?				How big is the difference?
Mean ± SEM of column A	66.47 ± 4.783, n=12			Mean ± SEM of column A	66.47 ± 4.783, n=12			Mean ± SEM of column F	74.43 ± 3.938, n=12			Mean ± SEM of column F	74.43 ± 3.938, n=12
Mean ± SEM of column B	60.22 ± 3.655, n=12			Mean ± SEM of column C	45.09 ± 5.957, n=10			Mean ± SEM of column G	66.57 ± 3.042, n=12			Mean ± SEM of column H	40.64 ± 4.905, n=11
Difference between means	-6.253 ± 6.02			Difference between means	-21.38 ± 7.547			Difference between means	-7.864 ± 4.976			Difference between means	-33.79 ± 6.24
95% confidence interval	-18.74 to 6.231			95% confidence interval	-37.12 to -5.637			95% confidence interval	-18.18 to 2.456			95% confidence interval	-46.77 to -20.81
R squared (eta squared)	0.04675			R squared (eta squared)	0.2864			R squared (eta squared)	0.1019			R squared (eta squared)	0.5827
F test to compare variances				F test to compare variances				F test to compare variances				F test to compare variances
F, DFn, Dfd	1.712, 11, 11			F, DFn, Dfd	1.293, 9, 11			F, DFn, Dfd	1.676, 11, 11			F, DFn, Dfd	1.422, 10, 11
P value	0.386			P value	0.677			P value	0.4053			P value	0.571
P value summary	ns			P value summary	ns			P value summary	ns			P value summary	ns
Significantly different (P < 0.05)?	No			Significantly different (P < 0.05)?	No			Significantly different (P < 0.05)?	No			Significantly different (P < 0.05)?	No

## Sheet: Figure 2-figure-S8C-Source Data
CS	CS_starved12h	CS_starved24h
66.67	25	6.25
72.73	66	23.08
72.55	-2.44	30.65
86.21	20.45	40
65.96	40.91	35.42
40	10.53	0
29.09	-18.92	19.57
37.78	12	-5.88
37.29		26.83
82.46		20.69
41.18		0
59.65		38.46
72.55		43.4
72.73		37.21
65.96		27.08
39.58		8.51
37.78		-7.55
62		18.37
60		25.49
12		44

## Sheet: Figure 2-S8C-Summary statistics
Table Analyzed	SSI_Starvation			Table Analyzed	SSI_Starvation
Column B	CS_starved12h			Column C	CS_starved24h
vs.	vs.			vs.	vs.
Column A	CS			Column A	CS
Unpaired t test				Unpaired t test
P value	0.0004			P value	<0.0001
P value summary	***			P value summary	****
Significantly different (P < 0.05)?	Yes			Significantly different (P < 0.05)?	Yes
One- or two-tailed P value?	Two-tailed			One- or two-tailed P value?	Two-tailed
t, df	t=4.02 df=26			t, df	t=5.911 df=38
How big is the difference?				How big is the difference?
Mean ± SEM of column A	55.71 ± 4.447, n=20			Mean ± SEM of column A	55.71 ± 4.447, n=20
Mean ± SEM of column B	19.19 ± 9.205, n=8			Mean ± SEM of column C	21.58 ± 3.682, n=20
Difference between means	-36.52 ± 9.084			Difference between means	-34.13 ± 5.774
95% confidence interval	-55.19 to -17.84			95% confidence interval	-45.82 to -22.44
R squared (eta squared)	0.3833			R squared (eta squared)	0.479
F test to compare variances				F test to compare variances
F, DFn, Dfd	1.714, 7, 19			F, DFn, Dfd	1.459, 19, 19
P value	0.331			P value	0.4179
P value summary	ns			P value summary	ns
Significantly different (P < 0.05)?	No			Significantly different (P < 0.05)?	No

## Sheet: Figure 2-figure-S8D-Source Data
Time (ZT)	CS Female
16-18	62.26	66.67	66.67	62.26	62	62
18-20		67.31	70.18		0	46.94	0	47.92	2.22	69.57	0
20-22	17.65	37.25	17.02	20.41	17.65	-19.15	52.08	33.93	37.25	33.93	20.41	17.65	37.25	17.02	17.65	37.25	-19.15	52.08
22-24	25.49	-8.33	25.49	-8.33	34.69	50.91	22.64	17.78	50.91	17.78	34.69	22.64
0-2	74.07	74.07	62.07	92.59	43.4	81.63	61.22	62.07	80.77	62.96	62.96	43.4	81.63	61.22	92.59	62.07	80.77
2-4	83.64	27.27	83.64	27.27	56	56	72.55	67.24	56	56	72.55	67.24
4-6	69.39	69.39	69.39	69.39	74.47	74.47	41.67	82.69	71.74	41.67	82.69	87.27	16.67	16.67	71.74	41.67	82.69	87.27	41.67	82.69
6-8	70.37	70.37	64.71	35	64.71	64.71	64.71	35	66	76.92	81.63	81.63	76.92	66
8-10	52.27	52.27	58.82	62.5	87.72	35.29	33.96	48	62.5	48	87.72	35.29	33.96	58.82	88.24	88.24	9.43	27.78	86.54	88.24	27.78	86.54	9.43	88.24
10-12	76.92	36.54	76.92	36.54	76.92	63.64	63.64	63.64	63.64	45	45
12-14	0	68	0	68	0	51.02	51.02	5.77	16.36	72.88	-2.38	16.36	72.88	54.72	11.36	0	6.38	5.77	11.36	0	16.36	5.77	-2.38	72.88	6.38	5.77	16.36	54.72	72.88
14-16	14.29	54.55	14.29	54.55	14.29	14.29	85.71	25	41.38	52.83	75.47	44.9	28.85	75.47	44.9	85.71	52.83	28.85	25	41.38	23.21	37.78	37.78	23.21
Time (ZT)	CS Male
16-18	59.57	88.68	88.68	59.57	29.63	29.63
18-20	48.08	48.08	72.22	72.22	70.59	70.59	64.15	26.09	61.11	70.59	26.09	70.59	61.11	64.15
20-22	69.64	79.59	14.55	46.94	69.64	19.51	65.31	67.35	79.59	67.35	46.94	69.64	79.59	14.55	69.64	79.59	19.51	65.31
22-24	76.09	35.42	76.09	35.42	58.7	45	60.78	54.9	45	54.9	58.7	60.78
0-2	78.45	79.17	77.3705	64.91	92.98	90.91	78.72	78.57	83.67	64.55	54.55	92.98	90.91	78.72	64.91	78.57	83.67
2-4	90.38	52.17	90.38	52.17	75	75	66.67	81.13	75	75	66.67	81.13
4-6	90.57	90.57	90.57	90.57	88.24	79.17	73.58	88.24	79.17	80.36	74.07	74.07	73.58	88.24	79.17	80.36	88.24	79.17
6-8	76.92	76.92	71.7	52	71.7	71.7	71.7	52	74.07	92	94.55	94.55	92	74.07
8-10	81.4	81.4	77.36	70.59	52.83	83.72	84.31	76.6	70.59	76.6	52.83	83.72	84.31	77.36	61.82	61.82	70.91	74.07	70.83	61.82	74.07	70.83	70.91	61.82
10-12	80	21.28	66.67	80	21.28	66.67	80	21.28	84.31	84.31	88.46	84.31	88.46	84.31	66.67	66.67
12-14	77.08	77.08	28.57	28.57	44	53.06	79.17	53.06	64.15	53.57	63.64	31.37	44	53.57	63.64	44	79.17	53.06	31.37	44	64.15	53.06	42.86	42.86
14-16	75.56	70	75.56	70	75.56	75.56	50.98	50	56.86	79.63	50.98	85.11	22.45	50.98	85.11	50.98	79.63	22.45	50	56.86	68.09	59.26	59.26	68.09
