# Supplementary material for: Emergence of social cluster by collective pairwise encounters in Drosophila
Source: eLife. 2020 Jan 21;9:e51921. doi: 10.7554/eLife.51921 (PMC6989122; doi:10.7554/eLife.51921)
Supplement: Figure 2—figure supplement 9—source data 1. [file elife-51921-fig2-figsupp9-data1.xlsx]

## Sheet: Figure 2-figure-S9C-Source Data
CS	CS dusted
107.892	67.8049
108.084	69.3705
107.634	62.1061
111.771	68.4988
108.877	49.2924

## Sheet: Figure 2-S9C-Summary statistics
Table Analyzed	Grooming duration
Column B	CS dusted
vs.	vs.
Column A	CS
Unpaired t test
P value	<0.0001
P value summary	****
Significantly different (P < 0.05)?	Yes
One- or two-tailed P value?	Two-tailed
t, df	t=11.87 df=8
How big is the difference?
Mean ± SEM of column A	108.9 ± 0.7588, n=5
Mean ± SEM of column B	63.41 ± 3.753, n=5
Difference between means	-45.44 ± 3.829
95% confidence interval	-54.27 to -36.61
R squared (eta squared)	0.9462
F test to compare variances
F, DFn, Dfd	24.46, 4, 4
P value	0.009
P value summary	**
Significantly different (P < 0.05)?	Yes

## Sheet: Figure 2-figure-S9D-Source Data
CS	CS dusted
52	67.57
47.73	61.7
48.89	45.9
58.03	52.27
75.73	47.73
64	49.13
60	55.88
66.67	51
70.73	71.49
72.55	68.78

## Sheet: Figure 2-S9D-Summary statistics
Table Analyzed	SSI_grooming
Column B	CS dusted
vs.	vs.
Column A	CS
Unpaired t test
P value	0.3167
P value summary	ns
Significantly different (P < 0.05)?	No
One- or two-tailed P value?	Two-tailed
t, df	t=1.03 df=18
How big is the difference?
Mean ± SEM of column A	61.63 ± 3.155, n=10
Mean ± SEM of column B	57.15 ± 3.006, n=10
Difference between means	-4.488 ± 4.357
95% confidence interval	-13.64 to 4.666
R squared (eta squared)	0.05566
F test to compare variances
F, DFn, Dfd	1.102, 9, 9
P value	0.8876
P value summary	ns
Significantly different (P < 0.05)?	No
