# Supplementary material for: Emergence of social cluster by collective pairwise encounters in Drosophila
Source: eLife. 2020 Jan 21;9:e51921. doi: 10.7554/eLife.51921 (PMC6989122; doi:10.7554/eLife.51921)
Supplement: Figure 3—figure supplement 1—source data 1. [file elife-51921-fig3-figsupp1-data1.xlsx]

## Sheet: Sheet1
CS Female
Touch Point and Frequency
Stage 1	Front	L_1	L_2	L_3	R_1	R_2	R_3	Rear
	9	13	15	16	15	18	14	12
	4	7	26	15	8	20	14	15
	4	9	17	16	7	13	16	11
Stage 2	Front	L_1	L_2	L_3	R_1	R_2	R_3	Rear
	3	7	14	12	8	11	8	10
	5	3	28	10	8	21	8	14
	14	7	10	13	17	14	9	20
Stage 3	Front	L_1	L_2	L_3	R_1	R_2	R_3	Rear
	2	6	9	6	4	14	11	13
	1	2	8	16	4	9	12	7
	6	3	7	11	6	11	8	6
