# Supplementary material for: Emergence of social cluster by collective pairwise encounters in Drosophila
Source: eLife. 2020 Jan 21;9:e51921. doi: 10.7554/eLife.51921 (PMC6989122; doi:10.7554/eLife.51921)
Supplement: Figure 4—figure supplement 2—source data 1. [file elife-51921-fig4-figsupp2-data1.xlsx]

## Sheet: Figure 4-S2B-Source Data
	edge	outside	inside
Stage 1	37	48	15
Stage 2	32	37	31
Stage 3	28	29	43
