# Supplementary material for: Emergence of social cluster by collective pairwise encounters in Drosophila
Source: eLife. 2020 Jan 21;9:e51921. doi: 10.7554/eLife.51921 (PMC6989122; doi:10.7554/eLife.51921)
Supplement: Figure 5—figure supplement 1—source data 1. [file elife-51921-fig5-figsupp1-data1.xlsx]

## Sheet: Figure 5-S1A-Source Data
CS	Gr33a1	Gr64f-/-	Gr32a1	ppk23-/-	IR76b-/-
72	-2	-33	37	0	36.54
95	44	-29	-19	11	26
57	36	13	46	30	17.39
88	-15	-19	42	35	40.91
76	-10		40	41	9.84
70	30		24	-8	69.49
76	70		58	14	37.25
20	57		63	27	54.72
67	46		65	-25	18.37
70	57
64	-9
55	13
85	13
76	15

## Sheet: Figure 5-S1A-Summary statistics
Table Analyzed	SSI_Gr mutants
Data sets analyzed	A: CS	B: Gr33a1	C: Gr64f-/-	D: Gr32a1	E: ppk23-/-	F: IR76b-/-
ANOVA summary
F	12.67
P value	<0.0001
P value summary	****
Significant diff. among means (P < 0.05)?	Yes
R square	0.5446
Brown-Forsythe test
F (DFn, DFd)	1.188 (5, 53)
P value	0.3278
P value summary	ns
Are SDs significantly different (P < 0.05)?	No
Bartlett's test
Bartlett's statistic (corrected)	3.048
P value	0.6926
P value summary	ns
Are SDs significantly different (P < 0.05)?	No
ANOVA table	SS	DF	MS	F (DFn, DFd)	P value
Treatment (between columns)	33033	5	6607	F (5, 53) = 12.67	P<0.0001
Residual (within columns)	27627	53	521.3
Total	60659	58
Data summary
Number of treatments (columns)	6
Number of values (total)	59
Number of families	1
Number of comparisons per family	5
Alpha	0.05
Dunnett's multiple comparisons test	Mean Diff.	95.00% CI of diff.	Significant?	Summary	Adjusted P Value	A-?
CS vs. Gr33a1	44.71	22.34 to 67.08	Yes	****	0.0001	B	Gr33a1
CS vs. Gr64f-/-	86.36	52.8 to 119.9	Yes	****	0.0001	C	Gr64f-/-
CS vs. Gr32a1	29.8	4.515 to 55.09	Yes	*	0.0153	D	Gr32a1
CS vs. ppk23-/-	55.47	30.18 to 80.75	Yes	****	0.0001	E	ppk23-/-
CS vs. IR76b-/-	34.86	9.57 to 60.14	Yes	**	0.0035	F	IR76b-/-
Test details	Mean 1	Mean 2	Mean Diff.	SE of diff.	n1	n2	q	DF
CS vs. Gr33a1	69.36	24.64	44.71	8.629	14	14	5.182	53
CS vs. Gr64f-/-	69.36	-17	86.36	12.94	14	4	6.672	53
CS vs. Gr32a1	69.36	39.56	29.8	9.755	14	9	3.055	53
CS vs. ppk23-/-	69.36	13.89	55.47	9.755	14	9	5.686	53
CS vs. IR76b-/-	69.36	34.5	34.86	9.755	14	9	3.573	53

## Sheet: Figure 5-S1B-Source Data
CS_f	CS_arista_f	CS_m	CS_arista_m
33.33	67.39	75.51	53.7
32.69	72.55	74.51	87.76
50	32.65	74	69.23
50.94	20	76.36	74
73.91	16.07	52.17	64.91
86.67	70.91	83.33	74
80.39	48.08	72.92	61.11
62		83.33	87.76
42.22		72.92	69.57
77.27		76.36	69.23
79.59		68.89	85.71
81.25		96.08	81.82
74.51		86.27	47.46
53.19		88
56.25		45.95

## Sheet: Figure 5-S1B-Summary statistics
Table Analyzed	cs_arista_SSI			Table Analyzed	cs_arista_SSI
Column B	CS_arista_f			Column D	CS_arista_m
vs.	vs.			vs.	vs.
Column A	CS_f			Column C	CS_m
Unpaired t test				Unpaired t test
P value	0.1094			P value	0.4308
P value summary	ns			P value summary	ns
Significantly different (P < 0.05)?	No			Significantly different (P < 0.05)?	No
One- or two-tailed P value?	Two-tailed			One- or two-tailed P value?	Two-tailed
t, df	t=1.676 df=20			t, df	t=0.8002 df=26
How big is the difference?				How big is the difference?
Mean ± SEM of column A	62.28 ± 4.684, n=15			Mean ± SEM of column C	75.11 ± 3.306, n=15
Mean ± SEM of column B	46.81 ± 9.171, n=7			Mean ± SEM of column D	71.25 ± 3.498, n=13
Difference between means	-15.47 ± 9.234			Difference between means	-3.856 ± 4.819
95% confidence interval	-34.74 to 3.788			95% confidence interval	-13.76 to 6.049
R squared (eta squared)	0.1231			R squared (eta squared)	0.02404
F test to compare variances				F test to compare variances
F, DFn, Dfd	1.789, 6, 14			F, DFn, Dfd	1.031, 14, 12
P value	0.3464			P value	0.9692
P value summary	ns			P value summary	ns
Significantly different (P < 0.05)?	No			Significantly different (P < 0.05)?	No
