# Supplementary material for: Emergence of social cluster by collective pairwise encounters in Drosophila
Source: eLife. 2020 Jan 21;9:e51921. doi: 10.7554/eLife.51921 (PMC6989122; doi:10.7554/eLife.51921)
Supplement: Figure 8—figure supplement 1—source data 1. [file elife-51921-fig8-figsupp1-data1.xlsx]

## Sheet: Figure 8-S1B-Source Data
	Single	Group
Pre-wing	0.45	0.34
	0.38	0.87
	0.89	0.67
	0.87	0.42
	0.69	0.46
	0.52	0.57
	0.63	0.63
	0.58	0.74
Post-wing	0.74	0.8
	0.51	0.78
	0.75	0.38
	0.51	0.59
	0.39	0.37
	0.81	0.73
	0.6	0.64
	0.46	0.45

## Sheet: Figure 8-S1B-Summary statistics
Table Analyzed	CaLexA_wing					Table Analyzed	CaLexA_wing
Column D	Pre wing - group					Column E	Post wing - group
vs.	vs.					vs.	vs.
Column A	Pre wing - single					Column B	Post wing - single
Unpaired t test						Unpaired t test
P value	0.6741					P value	0.9643
P value summary	ns					P value summary	ns
Significantly different (P < 0.05)?	No					Significantly different (P < 0.05)?	No
One- or two-tailed P value?	Two-tailed					One- or two-tailed P value?	Two-tailed
t, df	t=0.4295 df=14					t, df	t=0.0455 df=14
How big is the difference?						How big is the difference?
Mean ± SEM of column A	0.6263 ± 0.06522, n=8					Mean ± SEM of column B	0.5963 ± 0.05444, n=8
Mean ± SEM of column D	0.5875 ± 0.06233, n=8					Mean ± SEM of column E	0.5925 ± 0.06187, n=8
Difference between means	-0.03875 ± 0.09021					Difference between means	-0.00375 ± 0.08241
95% confidence interval	-0.2322 to 0.1547					95% confidence interval	-0.1805 to 0.173
R squared (eta squared)	0.01301					R squared (eta squared)	0.0001479
F test to compare variances						F test to compare variances
F, DFn, Dfd	1.095, 7, 7					F, DFn, Dfd	1.291, 7, 7
P value	0.9079					P value	0.7444
P value summary	ns					P value summary	ns
Significantly different (P < 0.05)?	No					Significantly different (P < 0.05)?	No
