# Supplementary material for: Emergence of social cluster by collective pairwise encounters in Drosophila
Source: eLife journal article supplement (doi:10.7554/elife.51921), 2020-01-20
Supplement: supp [file Figure 1-figure supplement 5E-Source Data.xlsx]

## Sheet: Figure 1-S5E-Source Data
Figure 1-figure supplement 5E
Female		2.40501	2.5542	2.96857	2.70979	2.65973	2.47074	2.21539	2.4824	2.29117	2.52499	2.45301	2.34546	2.24787	2.44049	2.20394	2.73967	2.55946	2.07518	2.07314	2.1885	2.55027	2.28589	2.43748	2.50933	2.70535	2.73042	2.3143	2.50294	2.58649	2.69827	2.65296
Male		2.25653	2.28894	1.7747	2.7293	2.36866	1.77845	2.20232	2.68002	2.29731	2.15012	2.698	2.50884	2.32992	2.40513	2.57292	2.34021	2.5305	2.44948	3.05957	2.84686	2.26976	2.26067	2.25528	2.26845	2.5792	2.72851	2.63737	2.16082	2.40602	2.07643	2.55609	2.31258	2.63247	2.29461	2.58057
RandomFemale		2.44841	1.6931	1.91364	2.20064	1.69728	2.16884	2.07034	3.47532	2.16444	1.63183	1.97672	1.95807	1.85634	1.87338	2.05684	1.87989	2.03148	1.41161	1.10331	1.36212	1.58657	2.18673	1.65258	2.32343	2.09074	1.69822	2.32183	2.17766	1.98991	1.263	2.24546	1.96966	1.50299	1.50815	1.88022	2.32494	2.55475	1.92362	1.77805	1.64221

## Sheet: Figure 1-S5E-Summary statistics
Table Analyzed	Data 1
Data sets analyzed	A : Female	B : Male	C : RandomFemale
ANOVA summary
F	30.66
P value	<0.0001
P value summary	****
Significant diff. among means (P < 0.05)?	Yes
R square	0.3731
Brown-Forsythe test
F (DFn, DFd)	3.528 (2, 103)
P value	0.033
P value summary	*
Are SDs significantly different (P < 0.05)?	Yes
Bartlett's test
Bartlett's statistic (corrected)	15.45
P value	0.0004
P value summary	***
Are SDs significantly different (P < 0.05)?	Yes
ANOVA table	SS	DF	MS	F (DFn, DFd)	P value
Treatment (between columns)	6.229	2	3.115	F (2, 103) = 30.66	P<0.0001
Residual (within columns)	10.46	103	0.1016
Total	16.69	105
Data summary
Number of treatments (columns)	3
Number of values (total)	106
Number of families	1
Number of comparisons per family	3
Alpha	0.05
Tukey's multiple comparisons test	Mean Diff.	95.00% CI of diff.	Significant?	Summary	Adjusted P Value
Female vs. Male	0.06221	-0.1247 to 0.2492	No	ns	0.7092	A-B
Female vs. RandomFemale	0.5305	0.3492 to 0.7119	Yes	****	<0.0001	A-C
Male vs. RandomFemale	0.4683	0.2929 to 0.6438	Yes	****	<0.0001	B-C
Test details	Mean 1	Mean 2	Mean Diff.	SE of diff.	n1	n2	q	DF
Female vs. Male	2.47	2.408	0.06221	0.07862	31	35	1.119	103
Female vs. RandomFemale	2.47	1.94	0.5305	0.07627	31	40	9.837	103
Male vs. RandomFemale	2.408	1.94	0.4683	0.07378	35	40	8.977	103
