# Supplementary material for: Emergence of social cluster by collective pairwise encounters in Drosophila
Source: eLife journal article supplement (doi:10.7554/elife.51921), 2020-01-20
Supplement: supp [file Figure 1-figure supplement 7E_Source Data.xlsx]

## Sheet: Sheet1
	CS_Female																									CS_Male
Time (min)
36	4.58561	5.42108	3.73728	4.88987	4.27446	4.37756	5.01989	5.14875	3.66374	3.91776	4.70708	4.25739	3.4828	4.86434	4.69004	5.17872	4.76393	4.24714	3.97698	3.4828	4.86434					3.9994	4.23962	3.68575	3.86054	5.16268	3.73146	5.35918	4.3813	5.22803	3.99603	4.44472	3.7333	4.5937	4.15599	3.2767	4.29282	4.16196	4.46765	4.11029	4.70569	4.5937	4.15599
40	4.84495	5.06711	4.23913	4.64274	5.04817	4.16016	4.48501	4.82077	4.40217	4.32055	5.11885	4.12503	3.26988	4.18767	5.67316	4.41363	4.44794	4.02557	4.4283	3.26988	4.18767					4.92464	4.1353	4.27552	4.41447	4.12443	4.30137	4.72564	4.12672	4.93246	4.59628	4.39601	4.38523	3.87721	4.60114	3.33169	4.42041	4.96562	4.22128	4.03513	4.69754	3.87721	4.60114
44	4.43686	4.84072	3.8264	4.49822	5.0166	4.65874	4.62348	4.77354	4.42446	4.43176	5.17669	3.97179	3.44355	4.72765	5.41459	4.09697	4.95665	3.7224	4.01471	3.44355	4.72765					4.78325	4.8634	3.82748	4.22169	3.84786	4.27762	3.19259	4.44471	4.03777	5.08696	4.2192	5.24158	4.11109	4.28268	3.35792	4.55589	5.2666	5.08826	4.86742	4.73603	4.11109	4.28268
48	4.82963	5.94236	3.72394	4.51867	5.79689	4.45927	3.91965	4.42427	4.4778	4.54433	4.51706	4.45921	4.11463	4.30079	5.64503	4.25858	4.51587	3.9026	3.70266	4.11463	4.30079					4.12097	5.11198	4.46817	4.14475	4.57243	5.20275	4.1445	4.55562	4.01845	4.55578	3.99166	3.44883	4.44454	4.29825	3.3294	4.31674	4.37753	3.52232	4.2277	4.7494	4.44454	4.29825
52	5.08333	5.11742	3.36102	4.80563	4.90079	5.37702	5.52398	4.66153	4.70406	4.80831	5.45353	4.38059	3.52626	5.16823	4.90096	4.15864	4.229	3.66652	3.6607	3.52626	5.16823					3.94778	4.02451	4.54072	3.80059	3.90727	3.56439	3.68324	4.62239	4.15796	4.72396	3.93637	4.46473	3.78743	4.00459	4.02438	5.13112	4.20344	3.49322	4.54434	4.64788	3.78743	4.00459
56	4.97363	4.73419	3.81598	4.44644	4.57509	4.26112	4.27607	5.00118	5.24234	4.56688	4.61094	3.99385	4.96705	4.48626	5.38656	4.15649	4.34468	3.55401	3.60717	4.96705	4.48626					4.44831	3.8436	4.60792	4.19423	3.57947	4.63491	3.94307	4.39234	5.30343	4.60981	3.66075	3.48876	3.8518	4.1041	4.23972	5.02896	4.61682	3.77045	4.37947	3.89353	3.8518	4.1041
60	4.64143	5.09326	3.90194	4.59884	5.24422	5.23093	5.02155	4.21577	4.55801	4.90925	4.67604	4.3933	4.00737	4.53284	5.20862	3.89567	3.89886	3.7017	3.84051	4.00737	4.53284					4.24927	4.77187	5.03503	4.15837	3.55726	4.17423	4.05969	3.86334	4.54316	4.46653	4.01068	3.36522	4.40224	4.6371	3.8822	4.96914	4.90699	4.21967	4.16972	4.42461	4.40224	4.6371
64	4.9705	5.43476	3.82136	4.52528	4.6044	4.58213	4.40524	4.48758	4.38969	4.71819	4.6436	4.58928	3.98411	4.43032	5.02142	4.73529	4.07085	4.33609	4.33209	3.98411	4.43032					4.5515	3.65659	3.55573	3.65509	3.79642	4.29756	4.487	3.77377	4.71423	4.83005	4.43247	3.55869	4.38696	4.7373	3.16898	4.60199	4.27677	3.52775	4.03519	4.28608	4.38696	4.7373
68	4.77515	5.55812	4.26408	4.59616	5.38582	4.75425	4.50439	4.17576	4.31037	4.89941	4.28916	4.04242	4.21237	4.07466	5.12941	4.77147	4.61319	3.68114	4.20474	4.21237	4.07466					3.79656	4.05807	3.43628	3.53435	4.7969	4.48577	4.2279	3.50367	4.66593	4.56791	4.27	3.24781	4.34788	4.12496	3.99991	3.75762	4.58108	3.43651	4.04879	4.38195	4.34788	4.12496
72	4.38926	5.05176	4.46824	4.32707	5.4084	5.62837	4.70488	4.81409	4.98035	4.76187	4.70559	3.69685	4.36686	4.8694	4.94659	4.88888	4.43211	3.54722	3.88984	4.36686	4.8694					4.08176	4.79163	3.34372	4.40689	3.94172	4.1517	4.43909	4.29702	4.16863	4.43262	4.3845	3.60165	4.35615	4.59	3.26262	3.92349	4.67971	3.50338	4.34265	4.4314	4.35615	4.59
76	4.9873	5.33135	3.85798	4.01511	5.04122	5.066	4.60126	4.8868	4.11387	4.49166	4.81596	3.52232	4.80443	3.88102	5.56715	5.34022	4.90602	3.55242	3.71189	4.80443	3.88102					3.93853	3.88658	3.56957	4.40194	3.21523	3.69259	4.43797	3.60356	4.67793	4.57555	4.28889	3.9775	4.28704	4.57095	3.33509	3.816	4.42118	4.34791	4.07148	4.31614	4.28704	4.57095
80	5.21732	4.55079	5.12229	4.79501	5.06023	4.94642	5.3073	4.40735	4.12279	4.25406	4.36855	3.59404	4.09893	4.18376	5.70226	4.52304	3.99738	4.02889	3.92936	4.09893	4.18376					3.68003	4.62587	3.58906	4.42013	4.43438	3.73255	4.43489	3.56782	4.62016	4.9206	3.41258	3.30276	4.23673	4.85941	4.34372	4.46092	4.61483	3.60573	4.2005	4.56634	4.23673	4.85941
84	4.74506	5.63861	4.74123	4.71569	5.11081	4.33493	4.47678	4.7109	4.76907	4.35951	4.76573	4.43283	4.25287	4.91408	5.68415	4.30032	3.57525	3.59766	4.43773	4.25287	4.91408					3.47369	4.71649	3.67948	4.15552	3.73282	3.76603	5.00443	3.55427	3.9096	4.55902	4.44844	3.3475	4.6241	4.87016	3.20673	4.09756	3.96349	4.08842	4.04489	5.06062	4.6241	4.87016
88	4.70815	5.23612	5.50763	4.2768	5.06133	4.37463	4.30489	4.74118	4.98461	4.8851	4.66461	3.63395	4.24582	4.37256	5.36473	4.31114	3.8771	3.72821	4.13908	4.24582	4.37256					3.63867	5.27744	3.60087	3.7165	3.49081	3.78207	4.75645	4.46006	3.81535	5.07508	4.02106	3.59285	4.39215	4.60624	3.52152	3.84656	4.30796	3.66245	3.94136	4.10209	4.39215	4.60624
92	4.3194	5.65024	3.87392	4.8155	5.43191	3.90145	5.03778	4.3382	4.61038	4.99535	4.47922	3.86338	3.72656	5.15436	5.17955	4.13136	4.79382	4.48765	4.20632	3.72656	5.15436					4.69338	4.9063	3.56774	5.11819	3.75005	3.93107	4.45425	4.11026	3.92729	4.72292	4.27358	3.37548	4.98002	4.54632	3.15653	3.84065	4.85135	3.54664	4.14819	4.07895	4.98002	4.54632
96	4.82122	5.51259	4.29186	4.92053	4.97462	4.27406	5.96692	4.37203	3.6197	4.87768	4.42208	3.82491	3.83596	4.27651	5.67145	4.18142	4.62818	4.50922	4.23102	3.83596	4.27651					5.4084	6.07147	3.645	5.29281	3.59773	3.66727	4.54187	4.15515	3.96852	4.61277	3.96857	3.51506	3.78471	3.98073	3.29303	3.78544	4.98314	3.41522	3.92207	4.0016	3.78471	3.98073
100	4.96655	4.86952	4.11368	5.0572	4.63092	4.68551	4.92974	4.45162	3.57079	3.94586	4.50038	3.657	4.05089	4.69713	5.69216	4.61109	4.59027	3.74578	4.07944	4.05089	4.69713					5.16413	5.25439	3.39916	5.00667	4.45558	4.08351	3.86397	4.81564	4.46214	4.47714	4.59535	4.20549	3.89004	4.33026	3.43701	3.86707	4.91939	3.44032	4.0054	4.64586	3.89004	4.33026
104	4.83324	4.55419	3.70836	5.17967	4.80851	3.72412	5.11077	4.95141	4.63654	4.86414	4.73384	3.72157	4.15006	5.1254	5.57618	3.76981	4.10789	3.57417	4.13885	4.15006	5.1254					4.75826	5.24613	3.48954	4.01562	4.13076	4.39125	4.29733	4.26205	3.99323	4.54728	4.41196	3.5772	4.09685	4.48427	3.45446	3.87081	4.93126	3.44137	3.97498	4.56139	4.09685	4.48427
108	4.93828	4.55995	3.89181	4.26626	4.22542	3.54666	4.62578	4.65608	4.65161	6.24871	5.36425	3.85051	4.24284	4.57362	4.61227	3.71702	4.51063	3.96516	4.1571	4.24284	4.57362					5.04716	4.48245	3.34665	3.44741	3.45359	4.29254	4.72793	4.30908	3.87478	4.67342	4.33146	3.72792	3.85012	4.24993	4.90272	4.19972	5.28485	3.6984	4.12239	4.57011	3.85012	4.24993
112	4.63916	4.59293	4.14683	4.74352	4.79521	3.87131	5.24889	5.30531	4.93559	5.19976	5.16446	4.4285	4.15636	4.49969	5.16345	4.00291	4.86467	4.16394	4.15112	4.15636	4.49969					5.63199	4.66946	3.26965	3.59287	3.58896	3.7485	3.60761	4.63417	4.67872	4.73187	3.9606	3.77873	3.95164	4.77295	4.39891	4.80451	4.62821	3.52131	4.3293	5.34218	3.95164	4.77295
116	4.58272	4.68114	4.39349	4.37063	4.27525	4.88539	5.03422	4.28975	4.2641	4.99541	6.02951	3.92277	4.05778	4.43266	4.75908	3.84959	4.93874	3.85554	3.99906	4.05778	4.43266					5.28481	4.69431	3.68625	4.43992	3.88162	3.89175	5.11572	4.31988	4.39982	4.81832	3.62456	4.2669	3.67376	3.66817	3.39636	4.55827	4.60492	3.80163	3.83195	4.22051	3.67376	3.66817
120	4.74486	5.19441	4.12662	4.627	4.93218	4.44763	4.80148	4.62606	4.45878	4.64447	4.82205	4.07377	4.05631	4.56297	5.20587	4.35353	4.46896	3.89864	4.03633	4.05631	4.56297					4.46626	4.6528	3.88655	4.21906	3.91375	4.08261	4.32855	4.25121	4.42303	4.62914	4.20544	3.86559	4.27629	4.44333	3.66344	4.26231	4.64096	3.87665	4.16975	4.5138	4.27629	4.44333
