# Supplementary material for: Emergence of social cluster by collective pairwise encounters in Drosophila
Source: eLife journal article supplement (doi:10.7554/elife.51921), 2020-01-20
Supplement: supp [file Figure 1M-Source Data.xlsx]

## Sheet: Figure 1M-Source Data
Figure 1M
Female		4.40443	4.23519	5.97461	3.99003	4.28156	4.26369	3.982	4.3195	4.65817	4.32885	4.79509	4.12217	3.856	4.98056	4.18112	3.65761	4.18254	4.03045	3.55771	4.40734	3.50315	4.07565	4.51448	4.2078	4.59771	4.02449	4.00015	4.41528	3.3063	5.36538	4.10569
Male		4.35239	3.57269	3.53029	4.37604	3.64212	3.53775	3.32035	3.91627	4.66639	3.86285	4.40039	3.4785	4.61765	3.90724	4.04406	4.73507	4.33458	3.58885	5.27266	4.4336	5.01931	3.90318	4.10046	4.28195	4.25698	4.54334	3.92306	3.94355	4.65077	3.99253	4.00126	4.00533	4.0878	4.67206	4.25446
RandomFemale		6.38487	5.58889	5.92375	6.02908	5.28347	5.23778	5.47757	6.65413	5.27517	5.67748	5.13729	5.30098	5.08672	5.44103	5.25112	5.81642	5.99971	5.47936	5.99591	5.76659	5.86523	6.13752	5.83125	5.82666	5.66977	5.30243	4.75045	5.91373	5.80247	5.58952	5.00327	5.6267	6.12771	5.34926	4.7578	6.38707	6.58841	5.80863	6.17261	5.87452

## Sheet: Figure 1M-Summary statistics
Table Analyzed	Data 1
Data sets analyzed	A : Female	B : Male	C : Random Female
ANOVA summary
F	119.3
P value	<0.0001
P value summary	****
Significant diff. among means (P < 0.05)?	Yes
R square	0.6985
Brown-Forsythe test
F (DFn, DFd)	0.01593 (2, 103)
P value	0.9842
P value summary	ns
Are SDs significantly different (P < 0.05)?	No
Bartlett's test
Bartlett's statistic (corrected)	0.8862
P value	0.642
P value summary	ns
Are SDs significantly different (P < 0.05)?	No
ANOVA table	SS	DF	MS	F (DFn, DFd)	P value
Treatment (between columns)	54.38	2	27.19	F (2, 103) = 119.3	P<0.0001
Residual (within columns)	23.48	103	0.2279
Total	77.86	105
Data summary
Number of treatments (columns)	3
Number of values (total)	106
Number of families	1
Number of comparisons per family	3
Alpha	0.05
Tukey's multiple comparisons test	Mean Diff.	95.00% CI of diff.	Significant?	Summary	Adjusted P Value
Female vs. Male	0.1192	-0.1608 to 0.3993	No	ns	0.5706	A-B
Female vs. Random Female	-1.411	-1.683 to -1.14	Yes	****	<0.0001	A-C
Male vs. Random Female	-1.53	-1.793 to -1.268	Yes	****	<0.0001	B-C
Test details	Mean 1	Mean 2	Mean Diff.	SE of diff.	n1	n2	q	DF
Female vs. Male	4.269	4.149	0.1192	0.1178	31	35	1.432	103
Female vs. Random Female	4.269	5.68	-1.411	0.1142	31	40	17.47	103
Male vs. Random Female	4.149	5.68	-1.53	0.1105	35	40	19.59	103
