# Supplementary material for: Emergence of social cluster by collective pairwise encounters in Drosophila
Source: eLife journal article supplement (doi:10.7554/elife.51921), 2020-01-20
Supplement: supp [file Figure 1P-Source Data.xlsx]

## Sheet: Figure 1P-Source Data
Figure 1P
Female		76.9231	90.625	61.5385	94.1176	85.9649	76	94.3396	89.0909	70.3704	72	87.037	83.3333	84.6154	74.0741	87.037	90	78	92.3077	95	83.0189	94.8276	94.3396	78.8462	88	75.5102	82.3529	84.6154	83.6735	98.1818	68	94.2308
		19.2308	4.6875	23.0769	3.92157	12.2807	20	3.77358	1.81818	22.2222	28	5.55556	14.5833	13.4615	20.3704	7.40741	8	18	1.92308	2.5	11.3208	5.17241	3.77358	15.3846	8	22.449	15.6863	15.3846	10.2041	1.81818	24	1.92308
		0	0	11.5385	0	0	2	0	7.27273	7.40741	0	1.85185	0	1.92308	5.55556	0	2	4	5.76923	2.5	3.77358	0	0	1.92308	2	2.04082	0	0	2.04082	0	6	3.84615
Male		71.1538	94.4444	85.7143	93.8776	90	85.7143	98.1132	91.8367	86	87.931	85.1064	92.3077	84.3137	88.6792	86	86.7925	79.1667	94.8276	60.3774	88.6792	80.8511	87.7551	94.4444	84	94.1176	75.5102	90	88.4615	87.2727	87.2727	92.1569	89.5833	90.6977	82.3529	86
		25	3.7037	14.2857	2.04082	10	14.2857	0	6.12245	10	8.62069	10.6383	7.69231	7.84314	9.43396	12	7.54717	18.75	3.44828	30.1887	9.43396	10.6383	10.2041	1.85185	12	3.92157	20.4082	8	7.69231	7.27273	9.09091	3.92157	10.4167	6.97674	9.80392	12
		1.92308	0	0	0	0	0	1.88679	0	2	3.44828	2.12766	0	1.96078	0	2	0	2.08333	1.72414	7.54717	0	6.38298	0	0	2	0	4.08163	0	0	1.81818	1.81818	0	0	2.32558	5.88235	0
RandomFemale		40	50	42	44	60	56	54	36	54	52	48	52	60	58	52	52	38	54	46	50	48	44	44	42	48	56	62	52	54	56	60	50	50	66	70	48	40	42	44	48
		48	42	46	48	32	40	34	52	42	42	44	42	36	32	42	36	54	36	40	40	36	44	44	48	46	36	38	40	34	34	32	44	40	20	26	36	46	48	44	40
		8	6	10	8	4	4	12	10	4	4	8	6	4	10	6	6	2	8	12	8	16	12	10	10	4	8	0	6	8	10	8	6	6	12	4	8	14	10	10	8
