# Supplementary material for: Emergence of social cluster by collective pairwise encounters in Drosophila
Source: eLife journal article supplement (doi:10.7554/elife.51921), 2020-01-20
Supplement: supp [file Figure 1Q-Source Data.xlsx]

## Sheet: Figure 1Q-Source Data
Figure 1Q
Female		57.6923	85.9375	38.4615	90.1961	73.6842	56	90.566	87.2727	48.1481	44	81.4815	68.75	71.1538	53.7037	79.6296	82	60	90.3846	92.5	71.6981	89.6552	90.566	63.4615	80	53.0612	66.6667	69.2308	73.4694	96.3636	44	92.3077
Male		46.1538	90.7407	71.4286	91.8367	80	71.4286	98.1132	85.7143	76	79.3103	74.4681	84.6154	76.4706	79.2453	74	79.2453	60.4167	91.3793	30.1887	79.2453	70.2128	77.551	92.5926	72	90.1961	55.102	82	80.7692	80	78.1818	88.2353	79.1667	83.7209	72.549	74
RandomFemale		-8	8	-4	-4	28	16	20	-16	12	10	4	10	24	26	10	16	-16	18	6	10	12	0	0	-6	2	20	24	12	20	22	28	6	10	46	44	12	-6	-6	0	8

## Sheet: Figure 1Q-Summary statistics
Table Analyzed	SSI
Data sets analyzed	A : Female	B : Male	C : RandomFemale
ANOVA summary
F	241.6
P value	<0.0001
P value summary	****
Significant diff. among means (P < 0.05)?	Yes
R square	0.8243
Brown-Forsythe test
F (DFn, DFd)	2.904 (2, 103)
P value	0.0593
P value summary	ns
Are SDs significantly different (P < 0.05)?	No
Bartlett's test
Bartlett's statistic (corrected)	2.104
P value	0.3492
P value summary	ns
Are SDs significantly different (P < 0.05)?	No
ANOVA table	SS	DF	MS	F (DFn, DFd)	P value
Treatment (between columns)	103571	2	51786	F (2, 103) = 241.6	P<0.0001
Residual (within columns)	22074	103	214.3
Total	125645	105
Data summary
Number of treatments (columns)	3
Number of values (total)	106
Number of families	1
Number of comparisons per family	3
Alpha	0.05
Tukey's multiple comparisons test	Mean Diff.	95.00% CI of diff.	Significant?	Summary	Adjusted P Value
Female vs. Male	-4.713	-13.3 to 3.874	No	ns	0.3955	A-B
Female vs. RandomFemale	61.87	53.54 to 70.2	Yes	****	<0.0001	A-C
Male vs. RandomFemale	66.59	58.53 to 74.64	Yes	****	<0.0001	B-C
Test details	Mean 1	Mean 2	Mean Diff.	SE of diff.	n1	n2	q	DF
Female vs. Male	72.32	77.04	-4.713	3.611	31	35	1.846	103
Female vs. RandomFemale	72.32	10.45	61.87	3.503	31	40	24.98	103
Male vs. RandomFemale	77.04	10.45	66.59	3.388	35	40	27.79	103
