# Supplementary material for: Emergence of social cluster by collective pairwise encounters in Drosophila
Source: eLife journal article supplement (doi:10.7554/elife.51921), 2020-01-20
Supplement: supp [file Figure 2D-Source data.xlsx]

## Sheet: Figure 2D-Source Data
Figure 2D
Female		65.3846	89.0625	21.1538	92.1569	64.9123	74	90.566	81.8182	53.7037	58	64.8148	70.8333	63.4615	46.2963	59.2593	86	68	82.6923	55	64.1509	91.3793	90.566	53.8462	78	57.1429	62.7451	75	53.0612	98.1818	58	75
Male		59.6154	79.6296	76.7857	87.7551	78.3333	76.7857	94.3396	69.3878	76	56.8966	40.4255	86.5385	70.5882	73.5849	84	79.2453	66.6667	79.3103	43.3962	84.9057	74.4681	81.6327	72.2222	86	72.549	40.8163	78	84.6154	74.5455	52.7273	92.1569	54.1667	39.5349	52.9412	76
RandomFemale		0	10	0	0	16	0	0	0	18	0	14	0	0	18	0	0	0	18	0	0	0	0	0	0	0	0	0	0	0	0	0	0	0	24	0	0	0	0	0	24

## Sheet: Figure 2D-Summary statistics
Table Analyzed	% Clustered flies
Data sets analyzed	A : Female	B : Male	C : RandomFemale
ANOVA summary
F	312.5
P value	<0.0001
P value summary	****
Significant diff. among means (P < 0.05)?	Yes
R square	0.8585
Brown-Forsythe test
F (DFn, DFd)	9.951 (2, 103)
P value	0.0001
P value summary	***
Are SDs significantly different (P < 0.05)?	Yes
Bartlett's test
Bartlett's statistic (corrected)	22.91
P value	<0.0001
P value summary	****
Are SDs significantly different (P < 0.05)?	Yes
ANOVA table	SS	DF	MS	F (DFn, DFd)	P value
Treatment (between columns)	111094	2	55547	F (2, 103) = 312.5	P<0.0001
Residual (within columns)	18306	103	177.7
Total	129400	105
Data summary
Number of treatments (columns)	3
Number of values (total)	106
Number of families	1
Number of comparisons per family	3
Alpha	0.05
Tukey's multiple comparisons test	Mean Diff.	95.00% CI of diff.	Significant?	Summary	Adjusted P Value
Female vs. Male	-2.163	-9.982 to 5.656	No	ns	0.7883	A-B
Female vs. RandomFemale	65.62	58.03 to 73.2	Yes	****	<0.0001	A-C
Male vs. RandomFemale	67.78	60.44 to 75.12	Yes	****	<0.0001	B-C
Test details	Mean 1	Mean 2	Mean Diff.	SE of diff.	n1	n2	q	DF
Female vs. Male	69.17	71.33	-2.163	3.288	31	35	0.9304	103
Female vs. RandomFemale	69.17	3.55	65.62	3.19	31	40	29.09	103
Male vs. RandomFemale	71.33	3.55	67.78	3.086	35	40	31.07	103
