# Supplementary material for: Emergence of social cluster by collective pairwise encounters in Drosophila
Source: eLife journal article supplement (doi:10.7554/elife.51921), 2020-01-20
Supplement: supp [file Figure 2E-Source data.xlsx]

## Sheet: Figure 2E-Source Data
Figure 2E
Female		26.9231	46.875	5.76923	45.098	26.3158	34	43.3962	47.2727	22.2222	4	31.4815	27.0833	21.1538	12.963	27.7778	26	18	40.3846	22.5	15.0943	46.5517	49.0566	5.76923	38	12.2449	31.3725	40.3846	20.4082	56.3636	14	25
Male		21.1538	24.0741	33.9286	44.898	26.6667	33.9286	49.0566	22.449	26	17.2414	6.38298	34.6154	21.5686	24.5283	24	41.5094	22.9167	32.7586	0	24.5283	34.0426	40.8163	35.1852	30	29.4118	10.2041	44	36.5385	27.2727	5.45455	27.451	12.5	9.30233	9.80392	26
RandomFemale		0	0	0	0	2	0	0	0	4	0	2	0	0	0	0	0	0	0	0	0	0	0	0	0	0	0	0	0	0	0	0	0	0	6	0	0	0	0	0	8

## Sheet: Figure 2E-Summary statistics
Table Analyzed	% Insiders
Data sets analyzed	A : Female	B : Male	C : RandomFemale
ANOVA summary
F	83.7
P value	<0.0001
P value summary	****
Significant diff. among means (P < 0.05)?	Yes
R square	0.6191
Brown-Forsythe test
F (DFn, DFd)	30.65 (2, 103)
P value	<0.0001
P value summary	****
Are SDs significantly different (P < 0.05)?	Yes
Bartlett's test
Bartlett's statistic (corrected)	110.5
P value	<0.0001
P value summary	****
Are SDs significantly different (P < 0.05)?	Yes
ANOVA table	SS	DF	MS	F (DFn, DFd)	P value
Treatment (between columns)	17760	2	8880	F (2, 103) = 83.7	P<0.0001
Residual (within columns)	10927	103	106.1
Total	28687	105
Data summary
Number of treatments (columns)	3
Number of values (total)	106
Number of families	1
Number of comparisons per family	3
Alpha	0.05
Tukey's multiple comparisons test	Mean Diff.	95.00% CI of diff.	Significant?	Summary	Adjusted P Value
Female vs. Male	2.493	-3.548 to 8.534	No	ns	0.5902	A-B
Female vs. RandomFemale	27.95	22.09 to 33.81	Yes	****	<0.0001	A-C
Male vs. RandomFemale	25.46	19.79 to 31.12	Yes	****	<0.0001	B-C
Test details	Mean 1	Mean 2	Mean Diff.	SE of diff.	n1	n2	q	DF
Female vs. Male	28.5	26.01	2.493	2.54	31	35	1.388	103
Female vs. RandomFemale	28.5	0.55	27.95	2.465	31	40	16.04	103
Male vs. RandomFemale	26.01	0.55	25.46	2.384	35	40	15.1	103
