# Supplementary material for: Emergence of social cluster by collective pairwise encounters in Drosophila
Source: eLife journal article supplement (doi:10.7554/elife.51921), 2020-01-20
Supplement: supp [file Figure 2F-Source data.xlsx]

## Sheet: Figure 2F-Source Data
Figure 2F
Female		5.78571	5.63333	5.66667	5.47826	5.4	5.76471	5.6087	5.61538	5.75	4.5	5.70588	5.46154	5.36364	5.71429	5.4	5.15385	5.44444	5.42857	5.44444	5.75	5.7037	5.61538	4.66667	5.73684	5.5	5.5	5.66667	5.1	5.64516	5.42857	5.61538
Male		5.45455	5.23077	5.89474	5.68182	5.6875	5.89474	5.80769	5.54545	5.76923	5.5	5.33333	5.55556	5.54545	5.38462	5.33333	5.59091	5.54545	5.68421	5.46154	5.5625	5.4	5.63158	5.6	5.26667	5.4	5.63636	5.68421	5.53333	5.66667	5.57143	5.16667	5.25	5.2	5.46154
RandomFemale		3	5	3	5	5.25

## Sheet: Figure 2F-Summary statistics
Table Analyzed	Data 1
Data sets analyzed	A : Female	B : Male	C : RandomFemale
ANOVA summary
F	27.34
P value	<0.0001
P value summary	****
Significant diff. among means (P < 0.05)?	Yes
R square	0.4494
Brown-Forsythe test
F (DFn, DFd)	10.81 (2, 67)
P value	<0.0001
P value summary	****
Are SDs significantly different (P < 0.05)?	Yes
Bartlett's test
Bartlett's statistic (corrected)	45.6
P value	<0.0001
P value summary	****
Are SDs significantly different (P < 0.05)?	Yes
ANOVA table	SS	DF	MS	F (DFn, DFd)	P value
Treatment (between columns)	7.397	2	3.698	F (2, 67) = 27.34	P<0.0001
Residual (within columns)	9.063	67	0.1353
Total	16.46	69
Data summary
Number of treatments (columns)	3
Number of values (total)	70
Number of families	1
Number of comparisons per family	3
Alpha	0.05
Tukey's multiple comparisons test	Mean Diff.	95.00% CI of diff.	Significant?	Summary	Adjusted P Value
Female vs. Male	-0.03554	-0.2545 to 0.1834	No	ns	0.92	A-B
Female vs. RandomFemale	1.242	0.817 to 1.667	Yes	****	<0.0001	A-C
Male vs. RandomFemale	1.277	0.8552 to 1.7	Yes	****	<0.0001	B-C
Test details	Mean 1	Mean 2	Mean Diff.	SE of diff.	n1	n2	q	DF
Female vs. Male	5.492	5.527	-0.03554	0.09133	31	34	0.5503	67
Female vs. RandomFemale	5.492	4.25	1.242	0.1772	31	5	9.908	67
Male vs. RandomFemale	5.527	4.25	1.277	0.1762	34	5	10.26	67
