# Supplementary material for: Emergence of social cluster by collective pairwise encounters in Drosophila
Source: eLife journal article supplement (doi:10.7554/elife.51921), 2020-01-20
Supplement: supp [file Figure 2G-Source data.xlsx]

## Sheet: Figure 2G-Source Data
Figure 2G
Female		4.84428	4.90977	5.9642	4.7963	4.87205	4.73437	4.35461	4.53569	5.01825	4.13076	4.01196	4.08368	4.24073	5.19484	4.7877	4.29779	4.74877	4.73308	4.67331	5.07513	4.62526	4.21615	4.98057	4.81687	4.94699	4.34224	4.94142	4.31713	4.33232	4.60305	4.17071
Male		4.12611	4.87998	4.27786	4.63886	4.9764	4.2869	4.73305	4.46758	4.87526	4.85884	4.09924	4.64194	4.75498	4.52298	4.88108	4.65804	4.98811	4.5832	NaN	5.10049	4.48567	4.58667	4.58569	4.93936	4.71696	5.94862	4.60841	4.366	4.92905	4.35546	4.77644	4.50279	4.32121	5.38693	4.84762
RandomFemale		NaN	NaN	NaN	NaN	2.6831	NaN	NaN	NaN	4.78841	NaN	3.86974	NaN	NaN	NaN	NaN	NaN	NaN	NaN	NaN	NaN	NaN	NaN	NaN	NaN	NaN	NaN	NaN	NaN	NaN	NaN	NaN	NaN	NaN	5.7532	NaN	NaN	NaN	NaN	NaN	4.27736

## Sheet: Figure 2G-Summary statistics
Table Analyzed	Data 1
Data sets analyzed	A : Female	B : Male	C : RandomFemale
ANOVA summary
F	1.821
P value	0.1698
P value summary	ns
Significant diff. among means (P < 0.05)?	No
R square	0.05156
Brown-Forsythe test
F (DFn, DFd)	6.908 (2, 67)
P value	0.0019
P value summary	**
Are SDs significantly different (P < 0.05)?	Yes
Bartlett's test
Bartlett's statistic (corrected)	16.54
P value	0.0003
P value summary	***
Are SDs significantly different (P < 0.05)?	Yes
ANOVA table	SS	DF	MS	F (DFn, DFd)	P value
Treatment (between columns)	0.7821	2	0.391	F (2, 67) = 1.821	P=0.1698
Residual (within columns)	14.39	67	0.2147
Total	15.17	69
Data summary
Number of treatments (columns)	3
Number of values (total)	70
Number of families	1
Number of comparisons per family	3
Alpha	0.05
Tukey's multiple comparisons test	Mean Diff.	95.00% CI of diff.	Significant?	Summary	Adjusted P Value
Female vs. Male	-0.04245	-0.3183 to 0.2334	No	ns	0.9278	A-B
Female vs. RandomFemale	0.3805	-0.1548 to 0.9157	No	ns	0.2113	A-C
Male vs. RandomFemale	0.4229	-0.109 to 0.9549	No	ns	0.145	B-C
Test details	Mean 1	Mean 2	Mean Diff.	SE of diff.	n1	n2	q	DF
Female vs. Male	4.655	4.697	-0.04245	0.1151	31	34	0.5217	67
Female vs. RandomFemale	4.655	4.274	0.3805	0.2233	31	5	2.41	67
Male vs. RandomFemale	4.697	4.274	0.4229	0.2219	34	5	2.695	67
