# Supplementary material for: Emergence of social cluster by collective pairwise encounters in Drosophila
Source: eLife journal article supplement (doi:10.7554/elife.51921), 2020-01-20
Supplement: supp [file Figure 3A-Source Data.xlsx]

## Sheet: Sheet1
	CS Female
Number of flies in cluster	Latency (min)
5	4.00317	2.008	2.00317	2.00267	2.00933	2.00833
10	5.00633	4.00933	3.00167	3.67233	3.00917	3.00317
20	8.0025	8.004	5.00333	5.0025	7.00767	6.00483
25	9.3	13.3	7.9	8.76	11.4	8.668
30	10	15.0088	8.0025	11.0038	10.004	8.0025
40	10.4062	18.0092	10.0038	15.0067	17.0017	15.003
45	21.0028	20.0013	23.0062	24.0033	23.0097	22.0048
	CS Male
Number of flies in cluster	Latency (min)
5	3.002	2.00783	3.00267	3.01167	2.0095	2.00917	3.00083
10	4.00483	4.00033	4.00333	4.00667	3.00667	4.00367	4.11006
20	7.0005	7.00067	5.00017	6.005	7.00633	6.00633	6.00183
25	7.6	7.75	6.88	7.9	7.88	8.357	6.998
30	8.00433	8.00883	7.00833	8.00583	8.00917	9.01	8.00217
40	17.0025	14.0062	12.0062	13.0028	15.0002	17.3727	14.0032
45	21.007	22.005	24.3415	28.0072	19.0085	20.0057	19.0052
