# Supplementary material for: Emergence of social cluster by collective pairwise encounters in Drosophila
Source: eLife journal article supplement (doi:10.7554/elife.51921), 2020-01-20
Supplement: supp [file Figure 3B-Source Data.xlsx]

## Sheet: Sheet1
Encounter frequency
CS Female	CS Male
251	451
265	442
255	576
230	589
184	487
