# Supplementary material for: Emergence of social cluster by collective pairwise encounters in Drosophila
Source: eLife journal article supplement (doi:10.7554/elife.51921), 2020-01-20
Supplement: supp [file Figure 3C-Source Data.xlsx]

## Sheet: Sheet1
CS Female
	Social Frequency
Stage 1	112	109	93	102	85
Stage 2	65	97	104	84	43
Stage 3	74	59	58	44	56
CS Male
	Social Frequency
Stage 1	223	173	211	218	193
Stage 2	130	147	203	193	158
Stage 3	98	122	162	178	136
