# Supplementary material for: Emergence of social cluster by collective pairwise encounters in Drosophila
Source: eLife journal article supplement (doi:10.7554/elife.51921), 2020-01-20
Supplement: supp [file Figure 3E-Source Data.xlsx]

## Sheet: Sheet1
CS Male
Touch Point and Frequency
Stage 1	Front	L_1	L_2	L_3	R_1	R_2	R_3	Rear
	25	13	29	22	21	27	25	61
	21	27	5	16	14	29	23	38
	18	17	22	31	26	31	20	46
	27	10	28	29	13	24	36	52
	16	9	23	29	17	23	26	54
Stage 2	Front	L_1	L_2	L_3	R_1	R_2	R_3	Rear
	8	6	31	10	19	32	16	30
	20	8	36	27	15	22	26	36
	29	12	28	23	17	18	20	56
	24	36	16	17	19	26	24	32
	7	16	20	18	10	22	29	35
Stage 3	Front	L_1	L_2	L_3	R_1	R_2	R_3	Rear
	9	22	3	9	10	13	15	17
	23	4	16	11	8	13	10	37
	18	21	19	20	11	15	13	45
	23	9	29	14	24	27	21	31
	13	14	17	24	5	11	20	31
