# Supplementary material for: Emergence of social cluster by collective pairwise encounters in Drosophila
Source: eLife journal article supplement (doi:10.7554/elife.51921), 2020-01-20
Supplement: supp [file Figure 3F-Source Data.xlsx]

## Sheet: Sheet1
CS Male
	Behavioral Response of "Interactee"
Stage 1	leg	wing
	51	155
	108	108
	43	78
	84	118
	75	121
Stage 2	56	135
	62	81
	51	104
	50	104
	87	73
Stage 3	27	120
	51	35
	63	54
	43	85
	58	79
