# Supplementary material for: Emergence of social cluster by collective pairwise encounters in Drosophila
Source: eLife journal article supplement (doi:10.7554/elife.51921), 2020-01-20
Supplement: supp [file Figure 3G-Source Data.xlsx]

## Sheet: Sheet1
	CS Female
Behavioral Response of "Interactee"
Stage 1	leg	wing
	100	1
	85	0
	84	0
	80	2
	72	1
Stage 2	leg	wing
	55	1
	82	0
	75	0
	64	3
	33	0
Stage 3	leg	wing
	63	1
	52	0
	48	0
	39	1
	47	0
