# Supplementary material for: Emergence of social cluster by collective pairwise encounters in Drosophila
Source: eLife journal article supplement (doi:10.7554/elife.51921), 2020-01-20
Supplement: supp [file Figure 3I-Source Data.xlsx]

## Sheet: Sheet1
CS Female
Behavioral Response of "Interactor (A)" and "Interactee (B)"
Stage 1	A_Move	A_Stay	B_Move	B_Stay
	82	18	56	44
	69	31	49	51
	87	13	48	52
	74	26	47	53
	57	43	39	61
Stage 2	A_Move	A_Stay	B_Move	B_Stay
	77	23	51	49
	53	47	49	51
	69	31	48	52
	52	48	34	66
	49	51	44	56
Stage 3	A_Move	A_Stay	B_Move	B_Stay
	74	26	45	55
	41	59	34	66
	67	33	34	66
	32	68	30	70
	63	37	43	57
