# Supplementary material for: Emergence of social cluster by collective pairwise encounters in Drosophila
Source: eLife journal article supplement (doi:10.7554/elife.51921), 2020-01-20
Supplement: supp [file Figure 3J-Source Data.xlsx]

## Sheet: Sheet1
CS Male
Behavioral Response of "Interactor (A)" and "Interactee (B)"
Stage 1	A_Move	A_Stay	B_Move	B_Stay
	71.3	28.7	33.9	66.1
	74	26	38.7	61.3
	83.4	16.6	27.6	72.4
	76.3	23.7	37.6	62.4
	85	15	46.6	53.4
Stage 2	A_Move	A_Stay	B_Move	B_Stay
	77.6	22.4	24.3	75.7
	73.7	26.3	36.8	63.2
	88.2	11.8	25.1	74.9
	74.1	25.9	24.6	75.4
	73.9	26.1	29.1	70.9
Stage 3	A_Move	A_Stay	B_Move	B_Stay
	69.4	30.6	12.2	87.8
	72.1	27.9	23	77
	85.8	14.2	19.5	80.5
	70.8	29.2	21.3	78.7
	72.8	27.2	22.2	77.8
