# Supplementary material for: Emergence of social cluster by collective pairwise encounters in Drosophila
Source: eLife journal article supplement (doi:10.7554/elife.51921), 2020-01-20
Supplement: supp [file Figure 4-figure supplement 1A-Source Data.xlsx]

## Sheet: Sheet1
CS Female
Behavioral Response of the "Moving (A)" flies after encounter at the border of cluster																												move out
Stage 1	A_Move out	A_Move in	A_Stay in		A_Directly move in																							0	0	10	0
	0	70	0		30																							0	15	8	0
	0	78	4		18																							0	0	5	0
	10	52	19		19
	0	63	13		24
Stage 2	A_Move out	A_Move in	A_Stay in		A_Directly move in
	0	30	50		20
	15	65	5		15
	8	46	23		23
	0	61	11		28
Stage 3	A_Move out	A_Move in	A_Stay in		A_Directly move in
	0	41	24		35
	0	71	7		21
	5	58	16		21
	0	56	22		22
