# Supplementary material for: Emergence of social cluster by collective pairwise encounters in Drosophila
Source: eLife journal article supplement (doi:10.7554/elife.51921), 2020-01-20
Supplement: supp [file Figure 4-figure supplement 1B-Source Data.xlsx]

## Sheet: Sheet1
CS Female
Total Behavioral Response of the "Moving (A)" flies after encounter at the border of cluster																												move out
Move in	58
Stay	16
Directly in	23
Move out	3
