# Supplementary material for: Emergence of social cluster by collective pairwise encounters in Drosophila
Source: eLife journal article supplement (doi:10.7554/elife.51921), 2020-01-20
Supplement: supp [file Figure 4-figure supplement 1C-Source Data.xlsx]

## Sheet: Sheet1
CS Female
Behavioral Response of the "Stationary (B)" flies after encounter at the border of cluster
Stage 1	B_Move out	B_Move in	B_Stay in
	9.7	12.5	77.8
	36.4	0	63.6
	10	26.4	63.6
	19	14.3	66.7
Stage 2	B_Move out	B_Move in	B_Stay in
	11.9	16.7	71.4
	0	5.9	94.1
	70	0	30
	46.2	0	53.8
Stage 3	B_Move out	B_Move in	B_Stay in
	54.5	0	45.5
	54.5	0	45.5
	47.6	16.7	35.7
	38.1	33.3	28.6
