# Supplementary material for: Emergence of social cluster by collective pairwise encounters in Drosophila
Source: eLife journal article supplement (doi:10.7554/elife.51921), 2020-01-20
Supplement: supp [file Figure 4-figure supplement 1E-Source Data.xlsx]

## Sheet: Sheet1
CS Female
Total behavioral response of the "moving (A)" flies after encounter at the border of cluster
	Total Move out	Total Move in
Stage 1	0	100
	0	100
	11	89
	0	100
Stage 2	0	100
	15	85
	8	92
	0	100
Stage 3	0	100
	0	100
	5	95
	0	100
