# Supplementary material for: Emergence of social cluster by collective pairwise encounters in Drosophila
Source: eLife journal article supplement (doi:10.7554/elife.51921), 2020-01-20
Supplement: supp [file Figure 4-figure supplement 1G-Source Data.xlsx]

## Sheet: Sheet1
CS Female
Total behavioral response of the "Moving (A)"and "Stationary (B)" flies after encounter at the border of cluster
	Total Move out	Total Move in
Stage 1	5	95
	0	100
	11	89
	5	95
Stage 2	6	94
	11	89
	4	96
	0	100
Stage 3	0	100
	0	100
	6	94
	6	94
