# Supplementary material for: Emergence of social cluster by collective pairwise encounters in Drosophila
Source: eLife journal article supplement (doi:10.7554/elife.51921), 2020-01-20
Supplement: supp [file Figure 4B-Source Data.xlsx]

## Sheet: Sheet1
CS Male
Behavioral Response of the "Moving (A)" flies after encounter at the border of cluster
Stage 1	A_Move out	A_Move in	A_Stay in		A_Directly move in
	9	73	9		9
	11	65	22		2
	13	74	10		3
	17	73	10		0
Stage 2	A_Move out	A_Move in	A_Stay in		A_Directly move in
	21	62	13		4
	14	68	11		7
	4	96	0		0
	14	78	5		3
Stage 3	A_Move out	A_Move in	A_Stay in		A_Directly move in
	6	67	28		0
	5	81	14		0
	8	88	0		4
	0	81	11		7
