# Supplementary material for: Emergence of social cluster by collective pairwise encounters in Drosophila
Source: eLife journal article supplement (doi:10.7554/elife.51921), 2020-01-20
Supplement: supp [file Figure 4D-Source Data.xlsx]

## Sheet: Sheet1
CS Male
Behavioral Response of the "Stationary (B)" flies after encounter at the border of cluster
Stage 1	B_Move out	B_Move in	B_Stay in
	12	37	51
	15	26	58
	11	46	43
	13	63	23
Stage 2	B_Move out	B_Move in	B_Stay in
	0	39	61
	19	12	69
	15	15	70
	14	33	53
Stage 3	B_Move out	B_Move in	B_Stay in
	0	17	83
	18	32	50
	4	17	79
	8	15	77
