# Supplementary material for: Emergence of social cluster by collective pairwise encounters in Drosophila
Source: eLife journal article supplement (doi:10.7554/elife.51921), 2020-01-20
Supplement: supp [file Figure 4H-Source Data.xlsx]

## Sheet: Sheet1
CS Male
Total behavioral response of the "Moving (A)"and "Stationary (B)" flies after encounter at the border of cluster
	Total Move out	Total Move in
Stage 1	12	88
	15	85
	11	89
	13	87
	9	91
	11	89
	13	87
	17	83
Stage 2	0	100
	19	81
	15	85
	14	86
	21	79
	14	86
	4	96
	14	86
Stage 3	0	100
	18	82
	4	96
	8	92
	6	95
	5	95
	8	92
	0	99
