# Supplementary material for: Emergence of social cluster by collective pairwise encounters in Drosophila
Source: eLife journal article supplement (doi:10.7554/elife.51921), 2020-01-20
Supplement: supp [file Figure 5A-Source Data.xlsx]

## Sheet: Figure 5A-Source Data
SSIs of the indicated flies
Female					Male
CS	CS in the dark	norpA33			CS	CS in the dark	norpA33
94	0	22			88	14.29	21.74
64.15	-2.86	4			80	15.91	40
57.69	0	19.15			68.63	68.42	25.45
62	-23.4	-12.5			82	32.5	18.37
53.06	67.65	6.98			66.67	38.64	26.42
46.15	10.71	25			63.04	28.89	2.08
84	-2.94	39.13			55.77	0	4.17
60.78	0	1.82			85.71	46.94	14.29
41.67	1.92	0			34.09	21.95	2.17
42.86	27.08	5.77			40	50	43.18
60	75	47.37			44.23	2.5	16.22
41.67	24.44	-23.4			47.5	2.04	15
74.51	86.36	-10			55.1	35.71	32.56
59.18	18.18	-23.4			50	-11.11	-6.82
52.94	24.32				56	-42.11	12.07
44.9	20					-32.35	-6.82
25	13.33					4.55
71.15	55.81					0
38.78	22.86					68.57
71.43	64					9.09
52.94	53.13					59.09
52.94	38.1					-18.42
46.94	35.56					24.32
41.18	14.81					-11.9
	33.33					60.47

## Sheet: Figure 5A Summary statistics
Table Analyzed	cs_dark_ SSI				Table Analyzed	cs_dark_ SSI				Table Analyzed	cs_dark_ SSI				Table Analyzed	cs_dark_ SSI
Column B	F_CS (IR)				Column C	F_norpA33				Column F	M_CS (IR)				Column G	M_norpA33
vs.	vs.				vs.	vs.				vs.	vs.				vs.	vs.
Column A	F_CS				Column A	F_CS				Column E	M_CS				Column E	M_CS
Unpaired t test					Unpaired t test					Unpaired t test					Unpaired t test
P value	<0.0001				P value	<0.0001				P value	<0.0001				P value	<0.0001
P value summary	****				P value summary	****				P value summary	****				P value summary	****
Significantly different (P < 0.05)?	Yes				Significantly different (P < 0.05)?	Yes				Significantly different (P < 0.05)?	Yes				Significantly different (P < 0.05)?	Yes
One- or two-tailed P value?	Two-tailed				One- or two-tailed P value?	Two-tailed				One- or two-tailed P value?	Two-tailed				One- or two-tailed P value?	Two-tailed
t, df	t=4.566 df=47				t, df	t=8.059 df=36				t, df	t=4.937 df=38				t, df	t=7.771 df=29
How big is the difference?					How big is the difference?					How big is the difference?					How big is the difference?
Mean ± SEM of column A	55.83 ± 3.183, n=24				Mean ± SEM of column A	55.83 ± 3.183, n=24				Mean ± SEM of column E	61.12 ± 4.404, n=15				Mean ± SEM of column E	61.12 ± 4.404, n=15
Mean ± SEM of column B	26.3 ± 5.551, n=25				Mean ± SEM of column C	7.28 ± 5.723, n=14				Mean ± SEM of column F	18.72 ± 6.083, n=25				Mean ± SEM of column G	16.26 ± 3.77, n=16
Difference between means	-29.53 ± 6.468				Difference between means	-48.55 ± 6.024				Difference between means	-42.4 ± 8.588				Difference between means	-44.86 ± 5.773
95% confidence interval	-42.55 to -16.52				95% confidence interval	-60.77 to -36.33				95% confidence interval	-59.78 to -25.01				95% confidence interval	-56.67 to -33.05
R squared (eta squared)	0.3073				R squared (eta squared)	0.6434				R squared (eta squared)	0.3907				R squared (eta squared)	0.6756
F test to compare variances					F test to compare variances					F test to compare variances					F test to compare variances
F, DFn, Dfd	3.169, 24, 23				F, DFn, Dfd	1.886, 13, 23				F, DFn, Dfd	3.18, 24, 14				F, DFn, Dfd	1.28, 14, 15
P value	0.0073				P value	0.1775				P value	0.0282				P value	0.6404
P value summary	**				P value summary	ns				P value summary	*				P value summary	ns
Significantly different (P < 0.05)?	Yes				Significantly different (P < 0.05)?	No				Significantly different (P < 0.05)?	Yes				Significantly different (P < 0.05)?	No
