# Supplementary material for: Emergence of social cluster by collective pairwise encounters in Drosophila
Source: eLife journal article supplement (doi:10.7554/elife.51921), 2020-01-20
Supplement: supp [file Figure 5B-Source Data.xlsx]

## Sheet: Figure 5B-Source Data
SSIs of the indicated flies
Female						Male
CS	Surgery ( -ant-palp)	Orco-/-	orco (rescue)			CS	Surgery ( -ant-palp)	Orco-/-	orco (rescue)
81.48	2.17	22.92	57.69			64	46	39.13	60.78
73.08	19.23	11.48	31.48			75	66.04	71.43	81.25
82.35	41.67	2.04	37.5			53.06	66	65.12	69.57
55.32	41.67	27.08	61.54			46	70.83	73.91	88.24
50	20	34.69	37.5			56	24	63.46	47.92
63.27	2.17	16.67	52.38			81.25	56.6	62.07	73.91
81.48	-8.51	21.15	63.83			64	40	44	57.69
73.08	-8.51	7.69	33.33			91.84	70.73	58	81.4
82.35		-7.84	53.57			52.94		86	76.47
55.32		-18.37	84.31			50.98		55.56	75.51
50		-14	90			64.29		55.56	48.94
63.27		-17.78	50			61.54		80
38		22.22				64		56
32.65		22.92				68		52.38
69.39		11.48				73.47		45.28
80.39		2.04						60.87
25		16.67						63.79
71.15		-18.37						92.31
38.78		-17.78						60.38
71.43		22.22						69.23

## Sheet: Figure 5B Summary statistics
Table Analyzed	SSI_ORCO				Table Analyzed	SSI_ORCO				Table Analyzed	SSI_ORCO				Table Analyzed	SSI_ORCO				Table Analyzed	SSI_ORCO				Table Analyzed	SSI_ORCO
Column B	F_ORCO-/-				Column D	F_cs-ant-palp				Column C	F_orco_res				Column F	M_ORCO-/-				Column H	M_cs-ant-palp				Column G	M_orco_res
vs.	vs.				vs.	vs.				vs.	vs.				vs.	vs.				vs.	vs.				vs.	vs.
Column A	F_CS				Column A	F_CS				Column A	F_CS				Column E	M_CS				Column E	M_CS				Column E	M_CS
Unpaired t test					Unpaired t test					Unpaired t test					Unpaired t test					Unpaired t test					Unpaired t test
P value	<0.0001				P value	<0.0001				P value	0.2616				P value	0.7039				P value	0.1399				P value	0.3529
P value summary	****				P value summary	****				P value summary	ns				P value summary	ns				P value summary	ns				P value summary	ns
Significantly different (P < 0.05)?	Yes				Significantly different (P < 0.05)?	Yes				Significantly different (P < 0.05)?	No				Significantly different (P < 0.05)?	No				Significantly different (P < 0.05)?	No				Significantly different (P < 0.05)?	No
One- or two-tailed P value?	Two-tailed				One- or two-tailed P value?	Two-tailed				One- or two-tailed P value?	Two-tailed				One- or two-tailed P value?	Two-tailed				One- or two-tailed P value?	Two-tailed				One- or two-tailed P value?	Two-tailed
t, df	t=9.694 df=38				t, df	t=6.141 df=26				t, df	t=1.144 df=30				t, df	t=0.3834 df=33				t, df	t=1.534 df=21				t, df	t=0.9474 df=24
How big is the difference?					How big is the difference?					How big is the difference?					How big is the difference?					How big is the difference?					How big is the difference?
Mean ± SEM of column A	62.14 ± 4.086, n=20				Mean ± SEM of column A	62.14 ± 4.086, n=20				Mean ± SEM of column A	62.14 ± 4.086, n=20				Mean ± SEM of column E	64.42 ± 3.164, n=15				Mean ± SEM of column E	64.42 ± 3.164, n=15				Mean ± SEM of column E	64.42 ± 3.164, n=15
Mean ± SEM of column B	7.357 ± 3.904, n=20				Mean ± SEM of column D	13.74 ± 7.181, n=8				Mean ± SEM of column C	54.43 ± 5.42, n=12				Mean ± SEM of column F	62.72 ± 3.019, n=20				Mean ± SEM of column H	55.03 ± 5.992, n=8				Mean ± SEM of column G	69.24 ± 4.088, n=11
Difference between means	-54.78 ± 5.651				Difference between means	-48.4 ± 7.882				Difference between means	-7.712 ± 6.74				Difference between means	-1.701 ± 4.436				Difference between means	-9.4 ± 6.127				Difference between means	4.819 ± 5.086
95% confidence interval	-66.22 to -43.34				95% confidence interval	-64.61 to -32.2				95% confidence interval	-21.48 to 6.053				95% confidence interval	-10.73 to 7.325				95% confidence interval	-22.14 to 3.342				95% confidence interval	-5.679 to 15.32
R squared (eta squared)	0.7121				R squared (eta squared)	0.5919				R squared (eta squared)	0.04182				R squared (eta squared)	0.004434				R squared (eta squared)	0.1008				R squared (eta squared)	0.03605
F test to compare variances					F test to compare variances					F test to compare variances					F test to compare variances					F test to compare variances					F test to compare variances
F, DFn, Dfd	1.095, 19, 19				F, DFn, Dfd	1.235, 7, 19				F, DFn, Dfd	1.056, 11, 19				F, DFn, Dfd	1.214, 19, 14				F, DFn, Dfd	1.913, 7, 14				F, DFn, Dfd	1.224, 10, 14
P value	0.8447				P value	0.6647				P value	0.8825				P value	0.7216				P value	0.2858				P value	0.7094
P value summary	ns				P value summary	ns				P value summary	ns				P value summary	ns				P value summary	ns				P value summary	ns
Significantly different (P < 0.05)?	No				Significantly different (P < 0.05)?	No				Significantly different (P < 0.05)?	No				Significantly different (P < 0.05)?	No				Significantly different (P < 0.05)?	No				Significantly different (P < 0.05)?	No
