# Supplementary material for: Emergence of social cluster by collective pairwise encounters in Drosophila
Source: eLife journal article supplement (doi:10.7554/elife.51921), 2020-01-20
Supplement: supp [file Figure 5C-Source Data.xlsx]

## Sheet: Figure 5C-Source Data
CIs of the indicated flies
Female				Male
CS	Poxnm22			CS	Poxnm22
87.5	13.64			69.81	48.98
59.62	3.57			75	20.45
86.67	24.49			89.58	18.37
80.39	18.2766			88.89	32.61
62	29.716			94.64	35.42
42.22	24.35			84.91	44.44
77.27	12.57			78.43	8
79.59	38.46			55.1	0
81.25	45.95			94.64	41.67
74.51				63.04	1.96
53.19				67.31	32
56.25				73.08	13.21
56				76.47	34.69
41.67				58	15.56
89.8				41.67	18.37
26.53				68.75	34.78
73.91				86.27	19.15
				88	31.82
				53.33	18
				89.58	23.91
				72.92	20

## Sheet: Figure 5C Summary statistics
Table Analyzed	poxnm22_SSI				Table Analyzed	poxnm22_SSI
Column B	poxnm22_F				Column E	poxnm22_M
vs.	vs.				vs.	vs.
Column A	CS_F				Column D	CS_M
Unpaired t test					Unpaired t test
P value	<0.0001				P value	<0.0001
P value summary	****				P value summary	****
Significantly different (P < 0.05)?	Yes				Significantly different (P < 0.05)?	Yes
One- or two-tailed P value?	Two-tailed				One- or two-tailed P value?	Two-tailed
t, df	t=6.15 df=24				t, df	t=11.59 df=40
How big is the difference?					How big is the difference?
Mean ± SEM of column A	66.37 ± 4.485, n=17				Mean ± SEM of column D	74.73 ± 3.214, n=21
Mean ± SEM of column B	23.45 ± 4.424, n=9				Mean ± SEM of column E	24.45 ± 2.914, n=21
Difference between means	-42.93 ± 6.98				Difference between means	-50.29 ± 4.338
95% confidence interval	-57.33 to -28.52				95% confidence interval	-59.06 to -41.52
R squared (eta squared)	0.6118				R squared (eta squared)	0.7706
F test to compare variances					F test to compare variances
F, DFn, Dfd	1.941, 16, 8				F, DFn, Dfd	1.216, 20, 20
P value	0.344				P value	0.6659
P value summary	ns				P value summary	ns
Significantly different (P < 0.05)?	No				Significantly different (P < 0.05)?	No
