# Supplementary material for: Emergence of social cluster by collective pairwise encounters in Drosophila
Source: eLife journal article supplement (doi:10.7554/elife.51921), 2020-01-20
Supplement: supp [file Figure 5D-Source Data.xlsx]

## Sheet: Figure 5D-Source Data
CIs of the indicated flies
Female							Male
CS	iav1	nan36a	ppkESB	piezoKO			CS	iav1	nan36a	ppkESB	piezoKO
85.6588	84.4564	82.8183	81.5434	87.8594			97.3749	84.0717	88.6524	84.3551	79.4281
89.3654	91.2685	77.7494	76.0396	88.5988			93.3756	82.5475	76.2164	80.8207	79.7905
93.7673	87.5634	82.4792	68.4953	89.0107			95.5246	79.498	87.4883	71.6732	84.9387
86.3733	84.5606	72.7769	81.7751	83.123			90.5091	83.4526	81.7321	77.9807	88.3385
95.9799	88.0658	84.6351	84.455	83.9537			93.7686	84.8883	72.0773	86.6216	86.8457
86.3733	87.4389	62.5467	84.8131	82.1558			90.8941	83.4708	77.3212	82.8485	82.221
86.3733	85.3637		82.463	76.4907			83.547	86.9369		82.829	88.6367
86.3733	82.8811		84.8923	68.8655			93.3756	83.2412		84.6887	86.8496
93.7813	85.861		86.5691	85.6989			95.5246	83.3535		84.0338	88.0138
91.8199	86.2151		83.1285	88.7921			96.0438	85.8137		80.8765	79.7508
95.5452	87.769		83.4505	83.6304			97.3098	82.5498		81.73	86.087
96.5052	86.6823		84.0974	88.7162			96.0336	84.4339		81.3596	82.0545
94.5189	92.7263			83.3055			93.1573	84.4339		76.2315	86.454
96.5405	92.6442			87.2481				93.3226		77.3508	80.6503
93.3709	87.7257			91.8487				85.4558			84.9387
98.3329	90.9792			83.123				86.2401			85.364
95.7461	85.9373			87.0336				87.5166			85.4671
94.4215	85.0935			89.3043				84.6351			88.242
91.7335	90.9268			84.7707				89.3697			82.2308
97.5738	88.2373			85.5755				83.8401			88.037

## Sheet: Figure 5D-Summary statistics
Table Analyzed	SSI_mechao_gene_female										Table Analyzed	SSI_mechao_gene_male
Data sets analyzed	A : CS	B : iav1	C : nan36a	D : ppkESB	E : PiezoKO						Data sets analyzed	F : CS	G : iav1	H : nan36a	I : ppkESB	J : PiezoKO
ANOVA summary											ANOVA summary
F	22.77										F	15.16
P value	<0.0001										P value	<0.0001
P value summary	****										P value summary	****
Significant diff. among means (P < 0.05)?	Yes										Significant diff. among means (P < 0.05)?	Yes
R square	0.5551										R square	0.4715
Brown-Forsythe test											Brown-Forsythe test
F (DFn, DFd)	1.67 (4, 73)										F (DFn, DFd)	1.083 (4, 68)
P value	0.1661										P value	0.3718
P value summary	ns										P value summary	ns
Are SDs significantly different (P < 0.05)?	No										Are SDs significantly different (P < 0.05)?	No
Bartlett's test											Bartlett's test
Bartlett's statistic (corrected)	6.056										Bartlett's statistic (corrected)	4.511
P value	0.195										P value	0.3412
P value summary	ns										P value summary	ns
Are SDs significantly different (P < 0.05)?	No										Are SDs significantly different (P < 0.05)?	No
ANOVA table	SS	DF	MS	F (DFn, DFd)	P value						ANOVA table	SS	DF	MS	F (DFn, DFd)	P value
Treatment (between columns)	33833	4	8458	F (4, 73) = 22.77	P<0.0001						Treatment (between columns)	28301	4	7075	F (4, 68) = 15.16	P<0.0001
Residual (within columns)	27118	73	371.5								Residual (within columns)	31728	68	466.6
Total	60951	77									Total	60029	72
Data summary											Data summary
Number of treatments (columns)	5										Number of treatments (columns)	5
Number of values (total)	78										Number of values (total)	73
Number of families	1										Number of families	1
Number of comparisons per family	4										Number of comparisons per family	4
Alpha	0.05										Alpha	0.05
Dunnett's multiple comparisons test	Mean Diff.	95.00% CI of diff.	Significant?	Summary	Adjusted P Value	A-?					Dunnett's multiple comparisons test	Mean Diff.	95.00% CI of diff.	Significant?	Summary	Adjusted P Value	F-?
CS vs. iav1	42.08	24.51 to 59.65	Yes	****	0.0001	B	iav1				CS vs. iav1	34.19	13.38 to 54.99	Yes	***	0.0004	G	iav1
CS vs. nan36a	60.04	37.64 to 82.44	Yes	****	0.0001	C	nan36a				CS vs. nan36a	30.14	3.481 to 56.8	Yes	*	0.0217	H	nan36a
CS vs. ppkESB	45.38	30.16 to 60.6	Yes	****	0.0001	D	ppkESB				CS vs. ppkESB	58.62	39.38 to 77.87	Yes	****	0.0001	I	ppkESB
CS vs. PiezoKO	46.87	31.66 to 62.09	Yes	****	0.0001	E	PiezoKO				CS vs. PiezoKO	43.17	23.93 to 62.41	Yes	****	0.0001	J	PiezoKO
Test details	Mean 1	Mean 2	Mean Diff.	SE of diff.	n1	n2	q	DF			Test details	Mean 1	Mean 2	Mean Diff.	SE of diff.	n1	n2	q	DF
CS vs. iav1	53.1	11.02	42.08	7.038	20	12	5.98	73			CS vs. iav1	64.82	30.63	34.19	8.32	13	14	4.109	68
CS vs. nan36a	53.1	-6.937	60.04	8.971	20	6	6.692	73			CS vs. nan36a	64.82	34.68	30.14	10.66	13	6	2.827	68
CS vs. ppkESB	53.1	7.725	45.38	6.095	20	20	7.446	73			CS vs. ppkESB	64.82	6.197	58.62	7.695	13	20	7.618	68
CS vs. PiezoKO	53.1	6.231	46.87	6.095	20	20	7.691	73			CS vs. PiezoKO	64.82	21.65	43.17	7.695	13	20	5.61	68
