# Supplementary material for: Emergence of social cluster by collective pairwise encounters in Drosophila
Source: eLife journal article supplement (doi:10.7554/elife.51921), 2020-01-20
Supplement: supp [file Figure 5H-Source Data.xlsx]

## Sheet: Figure 5H-Source Data
CS	norpA33	ORCO-/-	iav1	nan36a	piezoKO
238	620	237	826	662	353.9
110.2	738	436	1023	1087	593.7
141.4	552	873	712	1105	654.2
146.6	987	820	458	925	332.7
156.6	428	761	1035	1160	641.7
169.8	798	796	616	809	460
237.04
144.8

## Sheet: Figure 5H Summary statistics
Table Analyzed	Latency of Transient Clusters
Data sets analyzed	A : CS	B : norpA33	C : ORCO-/-	D : iav1	E : nan36a	F : PiezoKO
ANOVA summary
F	15.04
P value	<0.0001
P value summary	****
Significant diff. among means (P < 0.05)?	Yes
R square	0.7015
Brown-Forsythe test
F (DFn, DFd)	1.725 (5, 32)
P value	0.1573
P value summary	ns
Are SDs significantly different (P < 0.05)?	No
Bartlett's test
Bartlett's statistic (corrected)	14.31
P value	0.0137
P value summary	*
Are SDs significantly different (P < 0.05)?	Yes
ANOVA table	SS	DF	MS	F (DFn, DFd)	P value
Treatment (between columns)	2568315	5	513663	F (5, 32) = 15.04	P<0.0001
Residual (within columns)	1092794	32	34150
Total	3661108	37
Data summary
Number of treatments (columns)	6
Number of values (total)	38
