# Supplementary material for: Emergence of social cluster by collective pairwise encounters in Drosophila
Source: eLife journal article supplement (doi:10.7554/elife.51921), 2020-01-20
Supplement: supp [file Figure 5I-Source Data.xlsx]

## Sheet: Figure 5I-Source Data
CS	norpA33	ORCO-/-	iav1	nan36a	piezoKO
5	16	3	5	2	6
6	3	7	3	2	7
6	5	3	6	2	7
6	8	5	4	1	5
5	10	3	3	2	3
3	6	3	2	2	4
4
8

## Sheet: Figure 5I Summary statistics
Table Analyzed	Number of Transient Cluster
Data sets analyzed	A : CS	B : norpA33	C : ORCO-/-	D : iav1	E : nan36a	F : PiezoKO
ANOVA summary
F	5.092
P value	0.0015
P value summary	**
Significant diff. among means (P < 0.05)?	Yes
R square	0.4431
Brown-Forsythe test
F (DFn, DFd)	2.955 (5, 32)
P value	0.0265
P value summary	*
Are SDs significantly different (P < 0.05)?	Yes
Bartlett's test
Bartlett's statistic (corrected)	23.94
P value	0.0002
P value summary	***
Are SDs significantly different (P < 0.05)?	Yes
ANOVA table	SS	DF	MS	F (DFn, DFd)	P value
Treatment (between columns)	128	5	25.6	F (5, 32) = 5.092	P=0.0015
Residual (within columns)	160.9	32	5.027
Total	288.9	37
Data summary
Number of treatments (columns)	6
Number of values (total)	38
Number of families	1
Number of comparisons per family	5
Alpha	0.05
Dunnett's multiple comparisons test	Mean Diff.	95.00% CI of diff.	Significant?	Summary	Adjusted P Value	A-?
cs vs. norpA33	-2.625	-5.831 to 0.5809	No	ns	0.1384	B	norpA33
cs vs. ORCO-/-	1.375	-1.831 to 4.581	No	ns	0.6829	C	ORCO-/-
cs vs. iav1	1.542	-1.664 to 4.748	No	ns	0.5868	D	iav1
cs vs. nan36a	3.542	0.3358 to 6.748	Yes	*	0.0262	E	nan36a
cs vs. piezoKO	0.04167	-3.164 to 3.248	No	ns	0.9999	F	piezoKO
Test details	Mean 1	Mean 2	Mean Diff.	SE of diff.	n1	n2	q	DF
cs vs. norpA33	5.375	8	-2.625	1.211	8	6	2.168	32
cs vs. ORCO-/-	5.375	4	1.375	1.211	8	6	1.136	32
cs vs. iav1	5.375	3.833	1.542	1.211	8	6	1.273	32
cs vs. nan36a	5.375	1.833	3.542	1.211	8	6	2.925	32
cs vs. piezoKO	5.375	5.333	0.04167	1.211	8	6	0.03441	32
