# Supplementary material for: Emergence of social cluster by collective pairwise encounters in Drosophila
Source: eLife journal article supplement (doi:10.7554/elife.51921), 2020-01-20
Supplement: supp [file Figure 5J-Source Data.xlsx]

## Sheet: Figure 5J-Source Data
Duration of potential clusters
CS	5.93	23	182	82	12	33	76	28.7			norpA33	7.72	4.36	31.44	13.4	23.16	32.28			ORCO-/-	9.48	12.8	8.7	8.7	7.5	12.52			iav1	17.76	6.5	13.56	6.4	6.08	20.28			nan36a	9.7	5.5	10	5.88	9	16.3		piezoKO	8.88	7.98	5.32
	6.32	19	47	83	26	13	44	27				25	5.4	25.64	10.9	41.56	27				27.24	10.32	10.52	7.2	16.92	7.2				15.76	12.5	16.2			11.5				9	7		9.72	8.6	12.45			12.28	23.6	5.56
	16.18	22		25	10	14	39					8.8	8.16	15.52	13	23.16	13.6				16.9	11.08	6.84	13.8	12.4	6.9				5.3	6.84	19.96															7.9	6.92	6.76
	29	73		29	25	30						19	14.72		6.5	16.28	9.2					20.48		13.76						5.6	24.6	5.4															6	11.24
	124	24			26	23						36.5	5.8		5	16.96	15.67					11.32		6.6						16	11.52																	24.76
		59			23							8.7			7.1	9	8.72					10.88									5																	10.6
					49							7.3			5.6	46						12																										28.04
					11							9.08			6	48
												6.88			45	28.44
															16	14.2
															7
															33
															7.5
															10
															12.3
ave.	36.286	36.6667	114.5	54.75	22.75	22.6	53	27.85				14.3311	7.688	24.2	13.22	26.676	17.745				17.8733	12.6971	8.68667	10.012	12.2733	8.87333				12.084	11.16	13.78	6.4	6.08	15.89				9.35	6.25	10	7.8	8.8	14.375			8.765	16.1629	5.88
[truncated: 3 more columns]

## Sheet: Figure 5J Summary statistics
Table Analyzed	Duration of Transient Clusters
Data sets analyzed	A : CS	B : norpA33	C : ORCO-/-	D : iav1	E : nan36a	F : PiezoKO
ANOVA summary
F	7.186
P value	0.0001
P value summary	***
Significant diff. among means (P < 0.05)?	Yes
R square	0.5289
Brown-Forsythe test
F (DFn, DFd)	2.222 (5, 32)
P value	0.0763
P value summary	ns
Are SDs significantly different (P < 0.05)?	No
Bartlett's test
Bartlett's statistic (corrected)	50.91
P value	<0.0001
P value summary	****
Are SDs significantly different (P < 0.05)?	Yes
ANOVA table	SS	DF	MS	F (DFn, DFd)	P value
Treatment (between columns)	7775	5	1555	F (5, 32) = 7.186	P=0.0001
Residual (within columns)	6924	32	216.4
Total	14699	37
Data summary
Number of treatments (columns)	6
Number of values (total)	38
Number of families	1
Number of comparisons per family	5
Alpha	0.05
Dunnett's multiple comparisons test	Mean Diff.	95.00% CI of diff.	Significant?	Summary	Adjusted P Value	A-?
cs vs. Column B	28.74	7.708 to 49.77	Yes	**	0.0045	B	Column B
cs vs. Column C	34.31	13.28 to 55.35	Yes	***	0.0007	C	Column C
cs vs. Column D	35.15	14.12 to 56.18	Yes	***	0.0005	D	Column D
cs vs. Column E	36.62	15.59 to 57.65	Yes	***	0.0003	E	Column E
cs vs. Column F	37.42	16.38 to 58.45	Yes	***	0.0002	F	Column F
Test details	Mean 1	Mean 2	Mean Diff.	SE of diff.	n1	n2	q	DF
cs vs. Column B	46.05	17.31	28.74	7.944	8	6	3.618	32
cs vs. Column C	46.05	11.74	34.31	7.944	8	6	4.319	32
cs vs. Column D	46.05	10.9	35.15	7.944	8	6	4.425	32
cs vs. Column E	46.05	9.429	36.62	7.944	8	6	4.61	32
cs vs. Column F	46.05	8.634	37.42	7.944	8	6	4.71	32
