# Supplementary material for: Emergence of social cluster by collective pairwise encounters in Drosophila
Source: eLife journal article supplement (doi:10.7554/elife.51921), 2020-01-20
Supplement: supp [file Figure 5K-Source Data.xlsx]

## Sheet: Figure 5K-Source Data
cs	norpA33	ORCO-/-	iav1	nan36a	piezoKO
2	-5	-7	-9	-5	-7
7	-8	-6	-4	-7	-4
2	-6	-6	-10	-6	-5
7	-5	-4	-4	-6	-5
1	-5	-4	-8	-7	-5
5	-7	-10	-8	-7	-4

## Sheet: Figure 5K Summary statistics
Table Analyzed	Nucleus Stability Index
Data sets analyzed	A : CS	B : norpA33	C : ORCO-/-	D : iav1	E : nan36a	F : PiezoKO
ANOVA summary
F	28.53
P value	<0.0001
P value summary	****
Significant diff. among means (P < 0.05)?	Yes
R square	0.8263
Brown-Forsythe test
F (DFn, DFd)	2.008 (5, 30)
P value	0.1061
P value summary	ns
Are SDs significantly different (P < 0.05)?	No
Bartlett's test
Bartlett's statistic (corrected)	9.948
P value	0.0767
P value summary	ns
Are SDs significantly different (P < 0.05)?	No
ANOVA table	SS	DF	MS	F (DFn, DFd)	P value
Treatment (between columns)	527.9	5	105.6	F (5, 30) = 28.53	P<0.0001
Residual (within columns)	111	30	3.7
Total	638.9	35
Data summary
Number of treatments (columns)	6
Number of values (total)	36
Number of families	1
Number of comparisons per family	5
Alpha	0.05
Dunnett's multiple comparisons test	Mean Diff.	95.00% CI of diff.	Significant?	Summary	Adjusted P Value	A-?
cs vs. norpA33	10	7.049 to 12.95	Yes	****	0.0001	B	norpA33
cs vs. ORCO-/-	10.17	7.216 to 13.12	Yes	****	0.0001	C	ORCO-/-
cs vs. iav1	11.17	8.216 to 14.12	Yes	****	0.0001	D	iav1
cs vs. nan36a	10.33	7.383 to 13.28	Yes	****	0.0001	E	nan36a
cs vs. piezoKO	9	6.049 to 11.95	Yes	****	0.0001	F	piezoKO
Test details	Mean 1	Mean 2	Mean Diff.	SE of diff.	n1	n2	q	DF
cs vs. norpA33	4	-6	10	1.111	6	6	9.005	30
cs vs. ORCO-/-	4	-6.167	10.17	1.111	6	6	9.155	30
cs vs. iav1	4	-7.167	11.17	1.111	6	6	10.06	30
cs vs. nan36a	4	-6.333	10.33	1.111	6	6	9.305	30
cs vs. piezoKO	4	-5	9	1.111	6	6	8.104	30
