# Supplementary material for: Emergence of social cluster by collective pairwise encounters in Drosophila
Source: eLife journal article supplement (doi:10.7554/elife.51921), 2020-01-20
Supplement: supp [file Figure 6-figure supplement 1B-Source Data.xlsx]

## Sheet: Figure 6-S6B-Source Data
Figure 6-figure supplement 1B
cs		2.5233	6.3054	6.4397	4.0588	1.1395	1.5531	4.6013	5.3902	4.7294	7.4171	5.1779	1.9027	1.3384	8.586	7.873	3.1674	2.7269	4.3431	1.0556	2.6037	2.5008	1.0581	5.1368	2.3536	0.9359	5.1835	4.9907	3.6713	2.3802	3.5614	2.9026	2.1342	2.965	3.2731	5.7761	7.2893	4.0014	7.3959	1.9727	1.4571	6.9848	3.2884	4.0423	3.8614	3.4167	2.9955	1.9291	4.5115
NorpA		9.4105	10.821	15.6782	8.164	7.7897	17.5356	15.7208	15.1737	14.2719	9.7882	8.3985	17.113	9.1691	13.845	13.4506	13.9069	13.4345	15.3352	11.9976	16.3032	9.2666	14.5346	13.9732	10.8583	15.8965	16.9993	13.3595	15.1466	16.9803	18.0502
ORCO		12.1549	9.5072	3.2155	11.0973	14.6608	15.47	7.9034	5.2496	6.8086	1.2225	12.3631	9.0806	9.9691	9.2796	6.5985	8.2492	6.7098	5.8329	9.1354	4.3687	11.7987	9.9921	3.9274	5.8788	7.501	10.2241	2.4843	6.734	6.6452	4.6894
iav		3.5156	6.5965	5.8378	4.3921	8.6636	3.0162	8.1524	5.5267	9.2723	6.0195	6.0704	8.3867	7.1273	11.2007	4.5198	7.7532	13.7171	7.9358	8.8963	7.3732	8.5911	7.492	10.9386	13.6114	12.7208	5.7389	6.266	7.9844	8.0331	14.6175
nan		4.7891	9.6307	8.8519	1.2475	4.2596	8.8213	10.8005	6.2445	2.7133	6.2065	10.1376	7.0241	2.4576	13.1426	4.0884	0.941	7.6741	8.2243	11.1979	7.2103	7.2223	3.3262	10.598	1.8271	7.4845	7.828	3.1452	7.001	9.1311	3.2208
piezo		6.9733	5.6796	1.7996	5.3894	1.2298	2.6085	13.825	2.7912	3.4272	7.946	2.4733	2.9408	11.7834	8.7371	4.3829	5.0587	6.872	8.1562	12.1368	8.0778	2.2142	3.0529	5.2781	8.2223	8.8592	9.7282	2.3868	6.351	10.5158	7.4894
[truncated: 12 more columns]

## Sheet: Figure 6-S6B-Summary statistics
Table Analyzed	Data 1
Data sets analyzed	A : cs	B : NorpA	C : ORCO	D : iav	E : nan
ANOVA summary
F	41.9
P value	<0.0001
P value summary	****
Significant diff. among means (P < 0.05)?	Yes
R square	0.5066
Brown-Forsythe test
F (DFn, DFd)	2.724 (5, 204)
P value	0.0209
P value summary	*
Are SDs significantly different (P < 0.05)?	Yes
Bartlett's test
Bartlett's statistic (corrected)	14.03
P value	0.0154
P value summary	*
Are SDs significantly different (P < 0.05)?	Yes
ANOVA table	SS	DF	MS	F (DFn, DFd)	P value
Treatment (between columns)	1831	5	366.1	F (5, 204) = 41.9	P<0.0001
Residual (within columns)	1783	204	8.738
Total	3613	209
Data summary
Number of treatments (columns)	6
Number of values (total)	210
Number of families	1
Number of comparisons per family	5
Alpha	0.05
Dunnett's multiple comparisons test	Mean Diff.	95.00% CI of diff.	Significant?	Summary	Adjusted P Value	A-?
cs vs. NorpA	-9.36	-11.03 to -7.686	Yes	****	0.0001	B	NorpA
cs vs. ORCO	-3.906	-5.58 to -2.232	Yes	****	0.0001	C	ORCO
cs vs. iav	-3.947	-5.62 to -2.273	Yes	****	0.0001	D	iav
cs vs. nan	-2.496	-4.17 to -0.8222	Yes	**	0.001	E	nan
cs vs. piezo	-2.161	-3.834 to -0.4869	Yes	**	0.0058	F	piezo
Test details	Mean 1	Mean 2	Mean Diff.	SE of diff.	n1	n2	q	DF
cs vs. NorpA	4.052	13.41	-9.36	0.661	60	30	14.16	204
cs vs. ORCO	4.052	7.958	-3.906	0.661	60	30	5.91	204
cs vs. iav	4.052	7.999	-3.947	0.661	60	30	5.971	204
cs vs. nan	4.052	6.548	-2.496	0.661	60	30	3.776	204
cs vs. piezo	4.052	6.213	-2.161	0.661	60	30	3.269	204
