# Supplementary material for: Emergence of social cluster by collective pairwise encounters in Drosophila
Source: eLife journal article supplement (doi:10.7554/elife.51921), 2020-01-20
Supplement: supp [file Figure 6-figure supplement 1C-Source Data.xlsx]

## Sheet: Figure 6-S6C-Source Data
Fig 6S1C
cs		14.37	18.69	19.83	14.09	15.44	12.42	15.5	17.44	12.84	15.27	16.46	14.36	12.43	19.39	19.95	12.62	13.24	18.09	12.29	14.56	23.32	12.16	21.14	18.69	16.16	23.86	96.56	17.65	21.34	28.32	40.21	16.18	18.46	20.51	22.01	19.81	20.96	21.44	23.49	23.18	23.14	19.2	17.31	18.09	19.94	20.83	17.06	17.34
NorpA		27.34	30.82	26.74	23.16	30.04	31.8	31.44	31.34	30.58	25.58	36.23	54.38	43.88	44.82	38.3	34.66	81.01	41.08	69.09	104.66	96.24	32.07	40.1	45.12	50.88	56.41	41.09	40.89	55.68	39.53
ORCO		40.93	35.81	29.28	35.66	48.2	38.85	34.09	30.21	34.99	12.47	39.4	27.95	42.38	54.35	35.1	19.95	26.79	31.44	41.05	27.55	48.08	30.69	26.46	21.9	26.08	31.23	17.82	24.47	49.98	21.94
iav		30.81	35.09	31.6	24.78	41.08	27.66	24.84	25.3	32.61	27.14	42.07	35.8	26.19	141.15	23.3	37.71	36.07	37.44	33.25	30.46	31.76	60.44	40.85	31.24	30.72	25.95	29.91	69.79	28.6	41.92
nan		23.51	27.83	26.01	14.63	24.36	20.46	28.84	23.86	15.76	24.28	25.77	42.2	27.58	36.03	23.07	28.27	42.78	34.79	37.01	36.8	26.88	26.64	29.4	20.54	31.12	26.35	29.04	28.38	29.74	20.03
piezo		24.13	24.06	22.21	22.13	13.37	17.48	34.13	22.98	22.12	35.9	35.1	27.42	29.33	29.2	35.45	29.8	31.72	26.9	38.51	31.42	21.2	16.62	15.46	22.66	21.6	24.74	14.48	25.82	24.5	22.2
[truncated: 12 more columns]

## Sheet: Figure 6-S6C-Summary statistics
Table Analyzed	Data 1
Data sets analyzed	A : cs	B : NorpA	C : ORCO	D : iav	E : nan
ANOVA summary
F	8.211
P value	<0.0001
P value summary	****
Significant diff. among means (P < 0.05)?	Yes
R square	0.1675
Brown-Forsythe test
F (DFn, DFd)	1.38 (5, 204)
P value	0.2332
P value summary	ns
Are SDs significantly different (P < 0.05)?	No
Bartlett's test
Bartlett's statistic (corrected)	80.08
P value	<0.0001
P value summary	****
Are SDs significantly different (P < 0.05)?	Yes
ANOVA table	SS	DF	MS	F (DFn, DFd)	P value
Treatment (between columns)	11112	5	2222	F (5, 204) = 8.211	P<0.0001
Residual (within columns)	55211	204	270.6
Total	66323	209
Data summary
Number of treatments (columns)	6
Number of values (total)	210
Number of families	1
Number of comparisons per family	5
Alpha	0.05
Dunnett's multiple comparisons test	Mean Diff.	95.00% CI of diff.	Significant?	Summary	Adjusted P Value	A-?
cs vs. NorpA	-20.43	-29.75 to -11.12	Yes	****	0.0001	B	NorpA
cs vs. ORCO	-8.769	-18.08 to 0.5461	No	ns	0.0725	C	ORCO
cs vs. iav	-13.78	-23.1 to -4.468	Yes	**	0.0011	D	iav
cs vs. nan	-3.664	-12.98 to 5.651	No	ns	0.7767	E	nan
cs vs. piezo	-1.353	-10.67 to 7.961	No	ns	0.9957	F	piezo
Test details	Mean 1	Mean 2	Mean Diff.	SE of diff.	n1	n2	q	DF
cs vs. NorpA	24.07	44.5	-20.43	3.679	60	30	5.554	204
cs vs. ORCO	24.07	32.84	-8.769	3.679	60	30	2.384	204
cs vs. iav	24.07	37.85	-13.78	3.679	60	30	3.747	204
cs vs. nan	24.07	27.73	-3.664	3.679	60	30	0.996	204
cs vs. piezo	24.07	25.42	-1.353	3.679	60	30	0.3679	204
