# Supplementary material for: Emergence of social cluster by collective pairwise encounters in Drosophila
Source: eLife journal article supplement (doi:10.7554/elife.51921), 2020-01-20
Supplement: supp [file Figure 6-figure supplement 1F-Source Data.xlsx]

## Sheet: Sheet1
Figure 6-figure supplement 1F
	mean acc
cs		58.5982	82.0465	83.4509	57.1458	55.8333	49.9783	61.625	73.4333	57.4457	70.7585	68.907	83.6667	44.2143	70.9333	82.035	60.0341	68.6765	79.2564	63.0658	54.2561	69.9044	33.25	98.1765	88.8864	96.3864	96	185.375	93.5526	108.393	93.713	192.909	107.625	87.4662	62.4079	90.6607	108.178	112.325	106.772	97.9	115.618	84.2965	69.025	78.6806	72.723	124.448	76.0161	81.3625	93.5598
NorpA		117.925	123.756	97.7937	103.298	83.2021	131.067	131.862	120.855	116.71	107.3	148.846	204.413	153.696	185.845	192.18	166.486	194.766	170.006	201.573	206.645	199.941	170.207	160.755	167.424	199.05	219.618	209.135	191.295	199.583	198.637
ORCO		181.803	146.227	113.954	140.106	212.553	147.781	139.125	154.85	122.918	51.8068	190.818	139.405	166.561	173.239	116.737	100.438	126.269	166.481	139.492	88.5463	164.59	159.865	82.9355	108.442	133.474	98.0852	72.5761	72.3227	105.703	107.597
iav		102.966	130.843	98.3681	122.629	130.498	124.52	124.208	121.351	128.475	100.711	149.912	161.644	135.454	142.156	121.228	117.526	147.103	162.488	140.129	117.549	157.61	130.165	161.189	145.568	138.558	126.731	128.793	132.788	123.513	160.782
nan		84.5614	94.4439	86.7024	58.3906	95.2803	97.75	113.271	104.194	79.6667	114.905	131.606	155.091	157.581	183.575	118.172	86.7969	135.025	133.571	169.338	154.66	131.565	106.466	132.207	81.2045	147.129	131.382	139.817	122.119	136.009	123.529
piezo		111.223	99.3924	67.0781	64.7554	44.25	68.46	133.931	106.456	78.1845	155.876	81.4491	112.905	117.223	126.331	101.408	134.955	99.5426	115.439	129.513	129.142	71.2647	62	64.8	59.1136	69.1746	87.125	79.4773	93.1979	102.864	80.407
	mean dec
cs		-60.1129	-71.7639	-77.8636	-66.8314	-51.6667	-66.9625	-57.8654	-93.2571	-54.7551	-73.4509	-63.1346	-70.57	-53.875	-72.0583	-75.8864	-59.3673	-54.8963	-73.7833	-76.1625	-46.5765	-66.3176	-44.25	-81.2111	-79.6034	-62.3676	-86.4146	-144.217	-85.7674	-113.812	-97.8276	-135.172	-128	-85.8784	-56.8155	-87.2442	-98.2716	-99.9609	-108.25	-71.1964	-98.7935	-66.1019	-67.0938	-78.6806	-72.723	-104.186	-65.4583	-81.3625	-71.2049
NorpA		-128.223	-94.7097	-105.008	-95.9717	-96.4615	-128.071	-127.782	-114.623	-127.241	-98.569	-144.449	-212.914	-149.991	-184.995	-161.629	-160.811	-202.815	-198.217	-182.114	-179.174	-202.13	-147.398	-168.551	-170.209	-168.213	-198.442	-194.369	-178.814	-223.709	-190.976
ORCO		-162.397	-137.85	-94.4722	-112.991	-154.143	-153.937	-137.314	-121.396	-113.894	-41.0556	-161.427	-129.758	-152.413	-149.397	-104.115	-100.357	-127.828	-146.4	-127.547	-97.0217	-178.57	-171.55	-69.3063	-85.3973	-113.312	-97.8023	-51.0662	-71.7091	-105.422	-95.9107
iav		-117.422	-131.349	-92.0964	-102.449	-123.224	-109.707	-113.189	-118.149	-121.072	-99.4835	-140.655	-126.736	-117.025	-149.089	-108.794	-114.714	-151.903	-142.597	-118.694	-112.722	-131.962	-133.765	-176.29	-142.565	-125.375	-107.948	-120.497	-141.234	-122.6	-141.942
nan		-81.9667	-97.6618	-83.8777	-51.1957	-85.9527	-92.625	-115.966	-70.2773	-72.6071	-93.6406	-126.329	-152.878	-144.179	-177.799	-101.987	-91.1087	-158.765	-132.704	-161.232	-147.58	-137.049	-140.345	-135.252	-77.8841	-123.373	-130.084	-121.75	-152.049	-129.85	-113.75
piezo		-121.069	-110.868	-55.4	-58.9569	-42.663	-87.087	-121.009	-105.186	-69.59	-158.949	-92.557	-121.142	-117.932	-111.498	-87.2458	-128.242	-100.495	-109.259	-132.261	-117.709	-66.2368	-60.2321	-60.6083	-60.9615	-79.8364	-79.7177	-56.2188	-78.3051	-79.7719	-82.7778
[truncated: 12 more columns]
