# Supplementary material for: Emergence of social cluster by collective pairwise encounters in Drosophila
Source: eLife journal article supplement (doi:10.7554/elife.51921), 2020-01-20
Supplement: supp [file Figure 6-figure supplement 1G-Source Data.xlsx]

## Sheet: Sheet1
Figure 6-figure supplement 1G
	max acc
cs		221.25	466.75	329.75	154.75	245.5	181.5	199.75	235.75	274.75	355.5	239	347.25	107.5	258.25	233.75	252.5	312.5	377.5	207	195	253.25	83	303.25	282.75	219.25	357.5	2414	438.75	300.75	593.5	817	365	366.5	242	281	367.25	396.75	351	479	511.75	286	200.75	331	282.25	412.75	426.75	285.5	339.25
NorpA		443.5	436.5	361.5	354	375.5	473.5	445.5	451	354.5	414.5	599.25	1315.5	905.75	702.75	641.75	861.25	1626.5	753.5	1029	1002	2385.75	540.25	623.25	1128	891.75	1371	931.5	777.5	1329.25	884.25
ORCO		729.75	547.5	327	878	971.25	721.5	852.25	523.25	686.25	311	820	536.25	731.75	1286.5	757.5	279.75	669.75	662.25	1026.25	554.5	957	620.75	242.25	337.25	415.5	447.5	284.75	244.5	1249.5	534.25
iav		408	599.75	392.25	487.5	694.5	563.5	377.5	463.75	726.5	504.75	577.5	479.25	466.25	3400.25	436.5	550.5	567.5	686.25	624.75	475.25	794	1234.25	802.25	607.5	495.75	503.25	393.75	1674.5	477.25	671
nan		454.25	322	359	184.5	597.5	359.75	535	371	215.25	346.25	421	541.75	432.75	737.5	417	328.75	554.75	517.75	802	808	540	389	526.75	304.75	449.25	486.5	452.25	428.25	589.25	353.5
piezo		470.5	456.25	458.75	289.5	142	235	738.25	436	247	704.25	433.75	415	550.75	551.25	407.5	510	396.5	340.75	501.75	629.5	457	135.5	380.5	237.5	258	285	162.5	376.5	294	275
	max dec
cs		-248	-277.5	-378.25	-245.75	-241.25	-152.5	-197.25	-248.75	-152.25	-200	-257.75	-241	-184.75	-310.25	-230.5	-199.5	-159.5	-252.25	-279	-148	-272	-149	-232	-234.25	-328.75	-254	-2244.75	-336.75	-357.75	-589.25	-635.25	-325.25	-292.75	-372.75	-292	-301.25	-315	-323.75	-224.25	-382.75	-248	-335.25	-202.75	-452.25	-323	-245.5	-331.5	-249.75
NorpA		-496.5	-363	-355	-402	-425	-404.5	-469.5	-364.5	-491.5	-273	-735.75	-990.5	-712.5	-956.5	-573	-584.25	-1921.5	-649.25	-1525	-2512.25	-2387.25	-563.75	-574.25	-788.75	-1272	-722	-641.5	-782.25	-1204.5	-608.25
ORCO		-741.75	-785.25	-610.25	-433.5	-803.75	-525.5	-546.25	-530.25	-408	-216	-712.5	-580.5	-572.5	-1174.25	-366	-475.5	-592.25	-738.75	-501.5	-321	-1008	-523.5	-275	-286.5	-317.75	-414	-199.25	-355.5	-1243.25	-506.25
iav		-443	-433.25	-533	-389.25	-480.75	-505	-383	-434.75	-643	-572.25	-521.25	-556	-408	-3275.75	-374.75	-465.5	-692.25	-629.25	-564	-411.5	-522.75	-1289.5	-837.25	-425.5	-490.75	-337	-348.5	-1306.75	-508.75	-499.25
nan		-315.75	-451.25	-347	-203	-235	-283.25	-537.75	-292.5	-284.75	-255.75	-464.25	-599.75	-532.5	-828.75	-339	-517	-803	-589	-561.5	-812	-566	-505.5	-518.5	-315.5	-503.75	-563.75	-569.75	-551	-612.75	-387.25
piezo		-553.75	-355.5	-273	-253.25	-128.25	-210	-588.5	-436	-329.5	-656.25	-583.5	-474.25	-479.5	-479	-477.25	-612.75	-384.5	-481.5	-560.25	-433.25	-401	-164	-340.5	-306.5	-344	-263.5	-165.5	-357.5	-325	-285.5
[truncated: 12 more columns]
