# Supplementary material for: Emergence of social cluster by collective pairwise encounters in Drosophila
Source: eLife journal article supplement (doi:10.7554/elife.51921), 2020-01-20
Supplement: supp [file Figure 6A-Source Data.xlsx]

## Sheet: Sheet1
	CS								norpA33									ORCO-/-								iav1							nan36a								PiezoKO
5-10min	84	116	76	81					835	957	916	835						635	575	435	485					315	530	770	937				1057	627	507	870					735	240	285	305
10-15min	66	66	36	87					785	812	585	630						460	532	395	540					365	475	525	645				982	505	590	770					487	110	187	135
15-20min	57	33	43	58					695	635	375	555						347	425	375	468					275	355	325	638				475	425	275	685					405	89	136	165
20-25min	88	78	53	68					510	395	225	460						395	557	423	470					225	115	245	465				340	135	167	547					375	95	158	181
