# Supplementary material for: Emergence of social cluster by collective pairwise encounters in Drosophila
Source: eLife journal article supplement (doi:10.7554/elife.51921), 2020-01-20
Supplement: supp [file Figure 6B-Source Data.xlsx]

## Sheet: Sheet1
	CS					norpA33				ORCO-/-				iav1				nan36a				PiezoKO
5-10min	0.76	0.72	0.48	0.56		0.09	0.063	0.074		0.22	0.25	0.2		0.14	0.15	0.17		0.12	0.12	0.16		0.14	0.16	0.17
10-15min	0.48	0.82	0.71	0.68		0.078	0.07	0.078		0.24	0.22	0.26		0.16	0.15	0.19		0.13	0.12	0.17		0.18	0.17	0.2
15-20min	1.16	1.1	0.93	0.89		0.1	0.087	0.092		0.38	0.35	0.32		0.25	0.19	0.22		0.18	0.13	0.22		0.22	0.19	0.24
