# Supplementary material for: Emergence of social cluster by collective pairwise encounters in Drosophila
Source: eLife journal article supplement (doi:10.7554/elife.51921), 2020-01-20
Supplement: supp [file Figure 6C-Source Data.xlsx]

## Sheet: Sheet1
	Move							Stay
"Interactor" (A)	CS	71.3	73.99	83.41	76.26	85.05		28.7	26.01	16.59	23.74	14.95
	norpA33	74	86.4	81.8	74.4	79		26	13.6	18.2	25.6	21
	ORCO-/-	55.7	72.2	70.8	81.4	78.6		44.3	27.7	29.2	18.6	21.4
	iav1	86.7	93.1	78.8				13.3	6.9	21.2
	nan36a	93.5	93.5	81.1				6.5	6.5	18.9
	PiezoKO	72	66.7	70.8				28	33.3	29.2
"Interactee" (B)	CS	56.25	48.62	48.39	46.53	39.08		43.75	51.38	51.61	53.47	60.92
	norpA33	80	78.2	80.7				20	21.8	19.3
	ORCO-/-	76.7	83.3	81.1				23.3	16.7	18.9
	iav1	83.3	96.6	90.4				16.7	3.4	9.6
	nan36a	93.5	100	92.7				6.5	0	7.3
	PiezoKO	84	82.1	86.5				16	17.9	13.5
