# Supplementary material for: Emergence of social cluster by collective pairwise encounters in Drosophila
Source: eLife journal article supplement (doi:10.7554/elife.51921), 2020-01-20
Supplement: supp [file Figure 6E-Source Data.xlsx]

## Sheet: Sheet1
CS												iav1												nan36a												ORCO-/-												norpA 33
6.00172	5.91902	8.662	5.72222	4.48	6.29667	0	7.65					11.5444	7.22556	8.91	10.9443	10.8115	14.25							14.0436	9.00177	13.724	20.085	14.0583	12.474	15.72						7.37368	7.63308	9.97111	7.48									12.0817	23.6622
5.83067	5.25439	6.936	4.85667	3.08	4.59	16.67	2.67					12.3944	7.46778	7.8975	8.78571	12.1782	16.8133							11.6417	11.0233	14.112	17.1867	13.1343	8.522	8.24						8.8615	10.2054	12.5556	6.48									11.0257	31.2446
5.79667	5.30854	6.99333	5.18667	6.61	9.39	15.5167	0					12.2639	11.5222	10.9025	9.66571	12.2682	15.51							18.7358	10.4044	14.988	20.6467	11.3071	10.622	6.615						8.64381	8.74077	11.6178	7.905									11.7929	31.4191
6.36033	5.65951	6.79419	5.27222	8.77	4.18667	12.8133	0					12.2289	9.71667	8.705	15.8929	16.7173	18.9733							19.0158	10.0244	13.6227	17.1467	11.1543	8.194	12.84						7.71238	12.94	9.46778	12.5725									10.7357	30.5454
5.01333	5.01829	6.66129	6.68222	9.72	6.00667	11.8167	0					11.0439	13.91	6.5825	17.4257	14.1352	21.2067							19.7383	11.5	13.646	18.2767	8.24429	11.518	12.19						7.59381	10.9485	7.87333	9.7975									13.2257	27.3791
6.57067	5.81476	5.90806	5.01722	6.61	5.88	9.77333	5.34					9.95	12.2722	8.185	12.6571	12.2348	18.16							19.2125	7.67278	12.328	16.96	15.4186	9.596	14.69						14.0829	8.97538	10.9044	9.6125									20.6886	20.0973
6.52233	5.4031	6.78323	6.98667	8.77	7.74	10.5733	8.36					11.8611	13.7289	7.5625	11.7571	16.4575	15.6233							18.1825	8.87111	15.8807	16.6733	10.7214	10.226	11.88						14.6491	8.92846	9.88111	17.3425									30.57	19.9509
6.178	4.55952	6.04129	5.38167	8.28	5.51	13.3533	1.19					9.93444	14.2656	9.53	15.82	16.2316	18.4833							17.2742	8.90556	14.928	17.17	8.32429	10.454	12.87						14.8033	9.08692	8.93667	15.9725									13.3	29.52
6.04867	5.43524	6.70563	5.33778	8.28	8.33667	8.12333	6.43					10.8539	15.2311	8.3975	14.7386	17.0531	16.7267							12.8833	10.1917	14.9053	17.0733	11.5214	10.104	12.49						11.7038	12.3139	8.97778	17.2125									22.8357	21.5073
7.21133	5.23238	6.31813	5.06333	15.83	7.27667	15.54	7.65					11.0311	16.2578	5.51	13.2971	19.5924	23.52							13.545	10.4444	14.19	14.5033	12.7914	13.61	13.735						11.0367	13.9131	10.8778	20.515									15.8686	26.8636
5.79516	5.29452	6.42438	5.25444	6.96	4.57	6.15333	5.97					10.5472	14.7233	10.9925	14.67	15.4725	21.6067							14.5675	12.9944	11.8373	11.6133	12.3843	14.584	10.555						13.1667	14.5508	12.6922	19.705									9.77	27.8136
5.91807	4.74143	5.105	5.51556	4.86	9.92667	6.96667	7.65					12.5417	15.8644	6.995	13.0343	16.9836	18.1267							15.4217	10.2478	15.122	7.81667	10.5286	11.834	9.665						11.6048	13.5823	12.0267	18.015									21.3757	27.91
6.01839	4.95429	7.0625	5.72556	8.28	5.33667	5.10333	8.45					12.9489	15.8911	8.5075	14.1071	18.5447	13.66							12.8783	12.5356	12.868	16.0167	13.6957	15.702	12.835						12.36	15.1238	14.5211	16.5225									18.63	24.6691
6.03032	4.74214	5.87281	5.11944	3.44	6.92333	10.6433	5.07					12.8578	14.6244	14.3475	9.95571	19.5188	15.2633							17.01	12.7089	13.4287	13.2567	14.8514	13.4	12.77						12.4862	15.3331	15.35	17.84									16.2186	22.6218
5.91871	4.24833	4.97219	4.50944	9.85	7.98333	10.14	2.39					13.4617	18.8589	10.165	12.46	17.7437	16.2067							13.6042	13.3678	16.868	11.82	13.5471	14.204	11.825						15.0891	12.5354	12.5844	13.875									21.9843	33.1082
5.31129	3.90738	5.62219	4.37444	3.26	6.66	5.85667	2.67					12.1794	14.7978	11.3325	8.30571	20.5335	20.9333							16.66	11.7033	14.4453	15.1167	13.6786	16.07	10.17						13.98	9.51	14.8033	15.21									14.0086	34.9055
4.23323	3.88571	4.76594	4.435	4.86	4.48	9.89667	3.38					11.735	14.3767	9.395	9.70143	18.351	14.74							16.9083	11.0678	15.336	13.1567	13.59	12.002	7.205						15.0295	14.5154	11.95	21.2425									23.05	36.8527
5.25193	4.15095	4.06625	4.43722	6.34	7.41	7.51667	0					14.1517	15.5844	12.515	10.6614	15.8061	19.77							17.6725	12.97	17.242	13.3	13.9914	13.498	10.675						13.7129	11.2131	10.9267	16.1925									16.4314	33.7727
4.53129	4.19595	4.19906	3.55556	1.09	4.97333	5.11	1.19					11.7228	15.9411	9.415	12.0343	17.1153	10.07							15.9292	12.6028	14.3293	9.55	11.49	16.934	12.015						15.5395	10.3877	13.9167	17.165									23.3029	33.3655
5.37742	3.79805	3.66893	3.48062	3.08	4.46667	9.12	4.93					11.3271	13.0133	4.3975	11.15	15.4925	17.5733							10.9475	10.1139	13.0753	15.28	8.20714	12.43	14.555						13.7052	9.39154	12.8444	20.9125									20.9071	28.6509
7.14613	4.58585	4.86821	3.75563	4.35	13.0767	7.34333	3.78					11.2788	9.49222	10.17	7.5	5.92034	13.5567							7.22333	6.58556	7.73	16.4267	7.41571	13.724	8.715						8.64095	8.75231	17.47	23.18									12.4514	11.7018
4.3329	3.37405	3.31188	3.79667	5.54	6.11	7.97	2.67					7.42222	9.55222	3.8725	10.0914	9.63	5.57667							10.6283	5.985	7.43533	16.64	8.34857	16.11	15.83						8.22333	4.77692	13.9656	18.4225									10.4571	10.5646
4.31258	3.76429	3.32375	3.20444	4.35	6.55333	7.29667	6.09					6.48833	13.26	4.635	8.48857	9.38636	6.71333							9.76583	4.83667	8.77267	15.9867	12.7814	10.97	10.02						5.04809	7.12308	11.5767	15.335									13.8071	8.97455
3.41645	3.22976	3.81062	4.29167	3.44	4.73667	6.89333	3.78					6.68556	15.1311	6.5875	7.13429	4.56205	8.85333							11.0717	4.19444	8.274	18.7433	8.21429	13.052	8.3						3.88429	3.51231	10.77	15.47									19.08	9.14182
3.9571	2.55333	4.23438	4.27333	0	6.58333	13.9933	8.7					5.04944	9.40778	4.63	8.99143	2.78886	11.38							8.23	3.44556	10.542	11.7967	11.25	14.66	9.89						2.55143	4.28538	10.04	14.3675									15.9343	17.9964
4.52355	2.91833	4.06844	3.60167	4.35	6.35	11.53	9.63					6.56167	13.2611	2.3425	8.57714	4.5792	12.3867							6.20083	3.14944	10.1613	22.69	10.8171	12.318	19.22						2.54952	6.91846	10.8333	12.5725									14.7671	14.6754
4.98161	2.92167	4.31875	4.41778	0	3.87333	10.6667	7.17					7.55111	12.3022	3.7425	8.99714	4.30227	10.39							9.04083	3.04389	9.142	14.6533	6.75857	13.166	12.77						3.02095	7.33385	10.9811	14.115									14.4743	15.3
3.95258	3.36333	4.63031	4.93167	11.96	6.89667	11.3933	12.87					6.94611	13.74	2.3925	8.18714	6.03454	12.56							7.01167	4.85889	9.67533	20.4567	5.56	15.404	10.86						3.81333	10.58	5.96667	14.2675									9.95	11.4746
4.87677	3.24714	4.81844	3.49778	3.08	7.88333	9.77333	10.75					6.93111	17.28	3.695	8.34714	7.77534	11.0967							5.50833	3.96167	10.2633	18.82	8.63857	8.878	13.23						3.34095	9.30462	4.92778	14.74									6.03571	13.9782
5.81645	3.48952	4.45937	5.12889	4.48	7.64333	9.41	12.87					7.57944	15.6433	6.32	9.83857	9.07579	10.6933							5.24	9.93	11.7573	15.0333	6.76714	15.4	12.405						4.55333	8.20692	4.12556	11.3275									19.3629	20.2709
5.40774	3.55524	4.26594	4.31278	10.02	8.78333	9.38	9.85					7.10667	17.1522	3.44	9.2	7.08591	10.6933							8.80083	5.00833	13.234	16.24	6.90714	13.506	12.975						4.14476	6.63	6.03111	13.8525									17.49	19.0727
5.20323	3.12762	5.10469	3.21833	6.15	4.09333	14.11	8.62					10.0022	18.1544	3.1175	9.63	12.3161	9.90667							9.54667	6.00444	11.7693	20.21	7.99143	19.446	6.235						4.96762	6.27385	5.88222	12.565									18.2071	20.0109
5.48645	2.9439	5.8875	3.80444	8.77	10.99	12.1967	8.7					8.18111	16.08	1.9075	11.1357	9.31125	11.0167							10.5758	7.08389	10.8473	15.6333	10.0757	12.998	20.615						4.38286	4.63846	5.15778	11.38									21.5843	27.2636
4.87677	3.14658	4.95031	3.51056	9.23	6.06333	11.2767	4.78					10.3956	14.6811	3.07	9.19857	8.98523	9.21333							10.4517	6.48	10.7613	21.4967	5.08	14.098	15.055						5.85381	5.70923	5.01889	13.705									18.7471	26.1836
4.93806	3.67439	5.31906	3.66222	5.44	7.03667	14.7767	8.45					7.47056	14.0222	1.795	9.22857	11.4238	6.36							11.12	6.90833	13.962	14.9733	9.17571	11.834	8.33						7.11238	5.38385	5.58889	10.875									20.1729	28.9827
5.00097	3.57171	4.09187	3.86	10.26	5.45333	15.02	6.97					8.44611	13.7044	2.985	9.15571	11.0557	10.16							11.035	7.48722	10.8073	13.6333	8.20429	16.336	11.89						3.58571	6.04615	5.68222	5.29									14.5971	21.1036
4.90935	3.11098	4.47406	5.66059	10.02	7.36333	10.5067	8.62					9.41167	14.8378	3.52	9.30143	14.2983	7.24							14.3583	6.88056	9.42133	18.14	8.28857	9.966	11.63						5.55048	6.56461	3.70778	8.655									11.0514	23.3118
5.66064	3.54122	3.83844	3.58647	2.43	9.13333	12.9067	5.34					10.1128	12.0678	5.16	7.66857	9.21568	9.3							10.3592	7.89944	10.4867	20.4633	8.02143	11.48	8.975						4.23857	9.55308	4.53667	6.855									12.5043	21.3091
5.11355	2.97927	4.95581	3.29118	10.02	5.43	10.41	7.27					8.58278	14.5433	0.495	9.68	10.7803	6.59							13.3875	8.66722	9.932	12.3833	5.58857	10.582	12.62						4.77619	9.51539	7.32444	6.815									18.1929	25.9373
4.55	1.48146	4.954	4.00235	11.09	6.98333	9.98333	10.69					10.5928	12.6311	1.28	10.6514	9.76386	7.64333							14.0018	6.89412	8.66667	20.3633	8.00143	10.64	9.15						5.035	9.80538	5.43333	7.4525									14.2814	29
[truncated: 9 more columns]
