# Supplementary material for: Emergence of social cluster by collective pairwise encounters in Drosophila
Source: eLife journal article supplement (doi:10.7554/elife.51921), 2020-01-20
Supplement: supp [file Figure 6F-Source Data.xlsx]

## Sheet: Sheet1
	Before encounter						After encounter
CS	5.43667	5.264	6.05033	5.115			4.694	3.59094	3.79125	2.72229
norpA33	18.0554	31.3886					9.93731	17.1559
ORCO-/-	12.2877	12.1856					5.77133	8.12278
iav1	11.494	15.9941					7.58267	10.9083
nan36a	14.9937	11.8072					10.6637	8.20187
PiezoKO	10.4852	8.71517					5.52069	6.97429
