# Supplementary material for: Emergence of social cluster by collective pairwise encounters in Drosophila
Source: eLife journal article supplement (doi:10.7554/elife.51921), 2020-01-20
Supplement: supp [file Figure 6G-Source Data.xlsx]

## Sheet: Sheet1
CS												iav1												nan36a												ORCO-/-												norpA 33
0.500769	0.386098	0.657586	0.403889	7.29	0.686667	0	0					1.213	2.28833	4.70556	12.005	3.97857	15.0907	15.2633						0.916364	1.21125	15.1036	0.56	10.6671	3.858	8.335						2.63	1.16154	7.81625	0.7225									10.09	7.06167
0.031724	0.596098	0.945333	0.238889	6.61	0	0	5.34					0.874	0.942222	5.54	6.7525	1.6075	12.2033	16.3867						1.55417	1.37167	16.556	6.37333	10.29	4.56	13.71						2.2105	0.865385	4.91889	1.195									5.45364	12.74
0.133333	0.146829	0.880667	0.237222	5.44	0.686667	0	0					0.788	1.585	3.97444	8.4875	1.05375	14.6811	11.8533						2.16417	2.55778	16.2707	3.81667	8.66714	4.68	12.91						1.70476	0.556154	4.45333	0									3.89	8.04
0.068667	0.37	1.24806	0.120556	1.09	0.686667	0	1.19					0.173	1.20833	5.80778	6.5725	1.57625	14.6206	13.73						0.549167	0.748889	15.7853	0.473333	8.97571	0.972	6.475						1.0881	0.723077	5.97889	0									3.59909	14.7414
0.104667	0.321707	0.683226	0.117778	4.48	0	0	0					0.347	0.795556	5.16556	6.6625	0.64	12.9057	16.0667						0.530833	1.03611	15.416	0.946667	10.3957	3.826	12.74						1.18143	0.335385	7.08444	0									2.39454	7.46429
0.064	0.133333	0.77	0.165556	3.92	0	0	0					1.042	1.675	3.62222	7.9225	0.495	14.9348	7.29667						2.47667	0.707778	16.0313	0.67	12.0043	3.26	18.39						2.42191	0.9	6.09556	0									2.88364	7.47143
0.214667	0.192143	0.749355	0.230556	0	0	0	0					0.625	0.654444	4.49333	6.725	0.65625	13.6515	6.43						2.0975	0.621111	14.4987	0	11.1514	2.174	12.89						1.76095	0.704615	8.64111	0.3025									2.45	9.12
0.252667	0.037381	0.559032	0.317778	1.09	0	0	0					0.245	0.372778	2.9	7.085	0.175	12.3823	9.17667						2.28	0.794444	17.5427	0.833333	7.41143	1.958	14.975						1.25048	0	7.54556	0									1.40727	9.31286
0.304	0.183095	0.29375	0.118333	0	0	0	0					0.625	0.881667	2.81444	6.8225	0	14.5011	10.9567						0.858333	1.21667	14.7993	0	10.1057	1.85	7.935						1.03238	1.61692	7.81222	0									3.24091	8.18286
0.436667	0.285238	0.629688	0.437222	0	0	0.523333	1.19					0.715	0.047222	3.81889	7.3875	0	16.0879	9.55667						0.316667	0.965556	13.516	0	9.98571	3.044	10.92						1.03952	1.07385	7.38889	0									3.40727	14.2814
0.107097	0.609286	0.149688	0	4.48	0	0	0					0.173	0.625556	5.33889	4.15	0.6125	15.5635	8.5						0.155833	1.48444	11.856	0	9.54143	1.718	12.395						0.940952	0.108462	9.44444	0.73									2.96	9.71571
0.253548	0.21381	0.690625	0	0	0.686667	0	2.67					0.173	0.498889	4.31667	6.4375	0	14.9001	3.08						0.255	0.643333	12.368	0	9.63714	1.458	11.745						1.02905	1.83846	11.7933	0.42									1.93454	8.7
0.175484	0.240476	0.293438	0	0	0.686667	0	0					0	0.529444	3.25889	8.0975	0	14.2681	4.84333						0.215	0.765556	12.3107	0	9.81429	1.752	15.345						0.581905	0.348462	9.25111	0									1.66454	17.2171
0.244516	0.50619	0.792188	0.075	0	0.686667	0	0					0.52	0.162222	4.31444	9.8175	0.15875	12.0656	5.69333						0.295833	1.06333	12.484	0	10.31	2.004	11.27						1.30905	0.869231	8.54333	0									1.30455	11.3586
0.045161	0.215	0.26375	0.057778	0	0.686667	0	0					0.173	0.74	2.67222	16.2025	0.15875	20.8534	6.95667						0	2.05944	18.7367	0	10.2686	2.43	12.335						0.669048	0.904615	10.9233	0									0.537273	8.97714
0.045161	0.164524	0.2975	0.441667	0	0.686667	0	0					1.012	0.371667	2.27889	12.7975	0.19375	14.1053	4.67333						0.054167	1.19167	13.5793	0	14.6057	1.214	11.635						0.840476	0.504615	7.35778	0.3025									1.07455	9.33286
0.168065	0.563333	0.474688	0	0	0.686667	0	0					0.173	0.748889	2.25333	12.705	0.19375	12.636	7.32333						0.154167	0.950556	14.0707	0	8.94	1.308	11.87						0.71	0.542308	9.81778	0									1.00545	12.8643
0.063871	0.823571	0.684375	0.082222	3.08	0.686667	0.466667	0					0	1.16667	2.50444	8.3075	0.175	12.7185	6.12333						0.209167	1.57611	14.2967	0	13.8229	0.768	7.645						1.00048	0.894615	4.43222	0									1.74727	11.2343
0.47871	0.520714	0.7025	0	3.08	2.37	0.466667	0					0	1.03111	1.07889	9.4575	0.63	13.7521	3.51333						0.209167	1.50222	10.02	0	9.03714	1.556	15.86						0.241905	0.242308	6.99889	0									0.818182	8.91
1.1229	0.856585	1.75562	0.990556	0	4.63667	2.09333	0					0.111	2.58167	2.30333	11.13	0.16375	7.06	2.61333						1.34909	2.23765	13.5971	0	7.48571	0	2.74						1.555	0.153077	8.21444	0									2.63556	13.012
1.97161	3.23756	4.2475	2.39056	6.61	11.63	4.68667	0					4.767	6.78222	6.24444	11.2375	4.57875	10.6773	14.29						12.7764	3.84588	9.74857	5.055	7.75429	5.15	3.29						7.2895	14.2038	12.3122	3.7975									8.50333	16.958
2.72613	5.32833	5.4775	4.06722	3.92	9.13667	5.96333	0					10.141	8.99944	11.2622	15.015	13.2863	9.07409	15.5033						16.8633	7.85333	14.97	16.5033	8.45857	9.408	1.095						10.3814	17.4031	18.14	13.5075									18.0427	11.0657
2.43065	3.76667	5.69031	4.33778	0	3.13667	3.91	0					8.155	10.2978	11.7011	16.6625	11.0475	11.1935	9.59667						16.4783	8.35389	14.3567	9.64333	8.57571	7.664	1.095						12.6033	15.7269	18.6189	11.125									16.69	14.44
3.14968	3.90191	5.34063	4.42056	0	5.68	4.96333	0					10.885	9.16611	9.94444	11.835	9.2025	11.4776	12.4567						11.2617	8.07333	14.4833	10.4567	8.1	10.836	0						11.6067	7.61231	17.9933	9.175									24.7082	9.08286
3.42484	3.815	4.99531	4.41222	0	2.33	10.71	0					5.949	9.43778	10.2089	7.83	9.30625	10.254	11.81						16.5142	6.73444	12.136	12.9733	5.71143	8.696	2.45						12.5857	11.1569	16.6333	10.785									21.8654	6.64571
3.2171	3.62881	4.96531	4.77833	0	1.70333	5.15333	0					6.774	11.2633	11.8022	9.9825	8.685	10.66	7.34						15.6167	5.94833	9.19667	14.6767	3.93	8.022	3.465						4.85857	13.1569	12.4367	13.8									17.9455	14.3657
2.35742	3.57405	5.48656	3.89444	0	0.76	9.45	0					6.445	11.9339	18.1011	9.83	8.77125	9.02364	16.1767						11.0283	5.85056	16.3147	17.9467	4.84857	11.656	0.55						3.69952	13.2069	5.29444	4.0825									17.4209	9.49571
3.32161	3.30048	5.22219	3.74944	0	6.13333	9.34333	0					6.031	9.14611	10.1567	12.0225	9.59	9.91773	14.5733						11.4317	6.28389	16.8853	8.08667	2.96857	9.402	0						4.62762	11.6015	5.5	7.5825									22.5118	11.9314
2.56161	2.56286	5.18813	3.72556	2.43	8.79333	6.96333	0					4.751	10.6533	9.20111	8.5175	6.9025	11.9634	11.76						13.7492	5.24167	17.7913	12.4833	4.87429	13.536	0.86						8.09333	15.0277	2.91222	8.3575									19.4	10.5543
2.35677	3.48333	4.81156	2.87222	2.43	13.2567	3.35	0					4.173	10.7917	12.64	10.1475	6.5975	9.83966	18.15						11.1042	4.70944	11.438	9.15333	3.36714	12.214	0.55						6.32429	11.8108	2.15556	11.6275									23.5991	12.8029
2.65097	3.47333	4.76406	2.51278	4.35	5.79667	1.48	0					3.954	9.41056	11.0311	6	9.23375	12.7751	19.56						16.0333	6.58611	14.8007	11.7733	5.90143	6.766	0.55						7.1681	13.2031	1.31556	11.465									19.0145	9.64286
2.02839	3.87381	5.09469	1.93889	5.54	7.50667	3.14	0					3.311	9.54	9.92222	7.1825	5.84125	14.2741	13.26						12.735	6.035	11.2473	5.71333	5.66857	7.4	3.675						5.71143	10.8715	2.28222	14.8625									16.6064	14.96
2.48613	3.32683	4.64813	3.03944	6.88	2.12	1.57	0					3.35	11.7944	9.83	4.9625	4.85	10.1089	18.23						13.44	6.93333	15.4627	9.95	7.73143	8.842	3.99						8.72857	16.64	1.21889	10.915									16.71	12.3557
2.92032	4.41781	4.8825	2.475	4.48	5.52667	2.93333	0					3.126	11.6244	13.6889	3.08	9.23375	12.7835	20.2833						9.97	6.38056	11.9553	8.27667	6.33429	4.234	6.25						5.35381	11.4269	1.73556	15.24									18.0827	12.9986
3.21258	2.93463	4.39969	2.50333	6.34	5.01333	2.09333	0					2.621	12.7356	8.98222	5.175	7.12875	13.6497	20.1533						12.85	5.13167	11.562	4.83	8.52857	5.864	3.875						4.72286	7.87615	3.69667	13.6525									19.1691	20.5643
2.86161	2.48024	4.48156	3.06412	7.69	3.42667	2.22	0					7.88	10.7272	11.0989	5.665	7.73625	13.8183	15.2367						12.6892	6.72667	14.358	5.74	7.03143	5.346	5.51						7.95048	13.0169	14.0322	14.4325									13.1954	13.7529
2.48936	3.07463	4.15594	3.84353	5.86	6.17333	2.15667	0					6.627	9.955	10.1756	5.3625	5.70375	12.7413	17.3233						14.115	5.75833	13.4673	5.63	6.31857	6.882	2.95						4.04524	12.52	10.5	12.2475									15.1409	8.39286
2.53452	2.49561	4.79312	3.64647	6.61	5.91333	0	0					7.957	10.6622	9.59111	3.8825	6.2525	11.1854	18.6133						13.5517	5.89222	12.9387	5.82667	11.7229	10.902	5.59						3.55571	16.8361	17.5478	12.73									17.4364	11.0029
1.26387	2.3461	3.64258	3.33824	7.69	5.04667	2.15667	0					7.886	10.3767	11.2789	4.0825	6.96875	11.8798	13.5767						11.865	5.13389	15.0027	5.41667	6.96571	9.084	6.13						3.82381	13.6631	7.50222	13.26									19.003	15.1014
2.32833	2.3154	3.30967	3.17882	9.35	3.5	0.523333	0					6.478	8.32	7.98889	8.58	5.72125	12.6652	11.42						14.4217	4.96389	12.7714	5.97333	9.61571	8.812	4.42						3.43263	12.955	4.8475	10.8375									22.3356	9.41833
[truncated: 9 more columns]
