# Supplementary material for: Emergence of social cluster by collective pairwise encounters in Drosophila
Source: eLife journal article supplement (doi:10.7554/elife.51921), 2020-01-20
Supplement: supp [file Figure 6H-Source Data.xlsx]

## Sheet: Sheet1
	Before encounter						After encounter
CS	0.24	0.360952	0.663125	0.201111			2.69833	4.37097	4.85872	3.47957
norpA33	14.0588	12.4					9.40115	19.2764
ORCO-/-	3.236	1.00222					7.60333	12.0572
iav1	3.22212	9.72655					9.49452	11.0055
nan36a	7.627	4.10906					13.0917	6.62
PiezoKO	1.37448	1.66448					8.01517	9.6225
