# Supplementary material for: Emergence of social cluster by collective pairwise encounters in Drosophila
Source: eLife journal article supplement (doi:10.7554/elife.51921), 2020-01-20
Supplement: supp [file Figure 7-figure supplement 1A-Source Data.xlsx]

## Sheet: Figure 7-figure-S1A-Source Data
CSxUAS-CsChrimson	CSxppk-GAL4	nan-GAL4xUAS-CsChrimson	iav-GAL4xUAS-CsChrimson	nompc-GAL4xUAS-CsChrimson	piezo-GAL4;cha-gal80xUAS-CsChrimson
41.24	59.26	46	-19.57	10.87	17.5
37.95	70.32	69.81	-10.91	19.51	24
47.85	71.9	52	4.65	20	21.21
36.63	58.21	76.36	-28.57	28	27.45
35.79	58.18	15.38	7.32	4	-1.89
29.79	76.12	32.43	17.24	12	16.98
67.48	52.94	41.38	-20	13.46	26.92
36.73	51.69	45.65	13.79	6.67	24.07
55.07	57.63	41.3	-12	-2.22	31.37
37.97	48.39	37.5		22.64	12.5
38.06	53.19	48.84		26.83	54
64.12	42.31	41.38		-6.38	-8.89
54.35	57.5	64.58		15.22	68.25
31.25	46	65.91		-19.15	50
46.49	69.39			-5.13	30.77
				4.26
				-21.15

## Sheet: Figure 7-S1A-Summary statistics
Table Analyzed	SSI_mechano_neuron_activation							Table Analyzed	SSI_mechano_neuron_activation							Table Analyzed	SSI_mechano_neuron_activation					Table Analyzed	SSI_mechano_neuron_activation
Column C	nan-GAL4xUAS-CsChrimson							Column D	iav-GAL4xUAS-CsChrimson							Column E	nompc-GAL4xUAS-CsChrimson					Column F	piezo-GAL4;cha-gal80xUAS-CsChrimson
vs.	vs.							vs.	vs.							vs.	vs.					vs.	vs.
Column A	CSxUAS-CsChrimson							Column A	CSxUAS-CsChrimson							Column A	CSxUAS-CsChrimson					Column A	CSxUAS-CsChrimson
Unpaired t test								Unpaired t test								Unpaired t test						Unpaired t test
P value	0.4044							P value	<0.0001							P value	<0.0001					P value	0.0058
P value summary	ns							P value summary	****							P value summary	****					P value summary	**
Significantly different (P < 0.05)?	No							Significantly different (P < 0.05)?	Yes							Significantly different (P < 0.05)?	Yes					Significantly different (P < 0.05)?	Yes
One- or two-tailed P value?	Two-tailed							One- or two-tailed P value?	Two-tailed							One- or two-tailed P value?	Two-tailed					One- or two-tailed P value?	Two-tailed
t, df	t=0.8471 df=27							t, df	t=8.655 df=22							t, df	t=7.729 df=30					t, df	t=2.989 df=28
How big is the difference?								How big is the difference?								How big is the difference?						How big is the difference?
Mean ± SEM of column A	44.05 ± 2.977, n=15							Mean ± SEM of column A	44.05 ± 2.977, n=15							Mean ± SEM of column A	44.05 ± 2.977, n=15					Mean ± SEM of column A	44.05 ± 2.977, n=15
Mean ± SEM of column C	48.47 ± 4.353, n=14							Mean ± SEM of column D	-5.339 ± 5.488, n=9							Mean ± SEM of column E	7.614 ± 3.562, n=17					Mean ± SEM of column F	26.28 ± 5.146, n=15
Difference between means	4.414 ± 5.211							Difference between means	-49.39 ± 5.707							Difference between means	-36.44 ± 4.714					Difference between means	-17.77 ± 5.945
95% confidence interval	-6.278 to 15.11							95% confidence interval	-61.23 to -37.56							95% confidence interval	-46.07 to -26.81					95% confidence interval	-29.95 to -5.591
R squared (eta squared)	0.02589							R squared (eta squared)	0.773							R squared (eta squared)	0.6657					R squared (eta squared)	0.2419
F test to compare variances								F test to compare variances								F test to compare variances						F test to compare variances
F, DFn, Dfd	1.995, 13, 14							F, DFn, Dfd	2.038, 8, 14							F, DFn, Dfd	1.622, 16, 14					F, DFn, Dfd	2.987, 14, 14
P value	0.2134							P value	0.2331							P value	0.369					P value	0.0495
P value summary	ns							P value summary	ns							P value summary	ns					P value summary	*
Significantly different (P < 0.05)?	No							Significantly different (P < 0.05)?	No							Significantly different (P < 0.05)?	No					Significantly different (P < 0.05)?	Yes
