# Supplementary material for: Emergence of social cluster by collective pairwise encounters in Drosophila
Source: eLife journal article supplement (doi:10.7554/elife.51921), 2020-01-20
Supplement: supp [file Figure 7-figure supplement 1B-Source Data.xlsx]

## Sheet: Figure 7-figure-S1B-Source Data
CSxUAS-CsChrimson	CSxppk-GAL4	ppk-GAL4xUAS-CsChrimson	nan-GAL4xUAS-CsChrimson	iav-GAL4xUAS-CsChrimson	nompc-GAL4xUAS-CsChrimson	piezo-GAL4;cha-gal80xUAS-CsChrimson
69.81	80.69	61.7	72.92	-23.08	26.67	64.58
68.75	88.1	86	28.57	10.91	-17.07	50
88.37	65.63	79.59	46.34	0	18.42	52.27
36	56.67	90	84	-7.5	25.17	12.24
55.93	64.29	95.65	67.65	-20.83	35	46.15
60.87	46.47	77.78	68.09	20	27.19	71.15
47.06	51.43	63.04	68.09	35.19	41.3	-18.75
66	87.19	79.07	67.65	20	11.9	0
77.55	39.39	86.05	57.5	35.19	56.36	25
52	74	79.07	78.26		56.41	10
54	59.43	70			9.43	39.53
50		68.63			32	42.55
		74			40
		88.24			63.83
		76.74			-6.82
		69.23			-11.63

## Sheet: Figure 7-S1B-Summary statistics
Table Analyzed	SSI_Mechano_neuron_activation_male					Table Analyzed	SSI_Mechano_neuron_activation_male					Table Analyzed	SSI_Mechano_neuron_activation_male					Table Analyzed	SSI_Mechano_neuron_activation_male					Table Analyzed	SSI_Mechano_neuron_activation_male				Table Analyzed	SSI_Mechano_neuron_activation_male					Table Analyzed	SSI_Mechano_neuron_activation_male
Column C	ppk-GAL4xUAS-CsChrimson					Column C	ppk-GAL4xUAS-CsChrimson					Column D	nan-GAL4xUAS-CsChrimson					Column E	iav-GAL4xUAS-CsChrimson					Column E	iav-GAL4xUAS-CsChrimson				Column F	nompc-GAL4xUAS-CsChrimson					Column G	piezo-GAL4;cha-gal80xUAS-CsChrimson
vs.	vs.					vs.	vs.					vs.	vs.					vs.	vs.					vs.	vs.				vs.	vs.					vs.	vs.
Column A	CSxUAS-CsChrimson					Column B	CSxppk-GAL4					Column A	CSxUAS-CsChrimson					Column A	CSxUAS-CsChrimson					Column A	CSxUAS-CsChrimson				Column A	CSxUAS-CsChrimson					Column A	CSxUAS-CsChrimson
Unpaired t test						Unpaired t test						Unpaired t test						Unpaired t test						Unpaired t test					Unpaired t test						Unpaired t test
P value	0.0008					P value	0.0157					P value	0.6098					P value	<0.0001					P value	<0.0001				P value	0.0001					P value	0.0052
P value summary	***					P value summary	*					P value summary	ns					P value summary	****					P value summary	****				P value summary	***					P value summary	**
Significantly different (P < 0.05)?	Yes					Significantly different (P < 0.05)?	Yes					Significantly different (P < 0.05)?	No					Significantly different (P < 0.05)?	Yes					Significantly different (P < 0.05)?	Yes				Significantly different (P < 0.05)?	Yes					Significantly different (P < 0.05)?	Yes
One- or two-tailed P value?	Two-tailed					One- or two-tailed P value?	Two-tailed					One- or two-tailed P value?	Two-tailed					One- or two-tailed P value?	Two-tailed					One- or two-tailed P value?	Two-tailed				One- or two-tailed P value?	Two-tailed					One- or two-tailed P value?	Two-tailed
t, df	t=3.787 df=26					t, df	t=2.593 df=25					t, df	t=0.5185 df=20					t, df	t=6.648 df=19					t, df	t=6.648 df=19				t, df	t=4.462 df=26					t, df	t=3.1 df=22
How big is the difference?						How big is the difference?						How big is the difference?						How big is the difference?						How big is the difference?					How big is the difference?						How big is the difference?
Mean ± SEM of column A	60.53 ± 4.155, n=12					Mean ± SEM of column B	64.84 ± 4.897, n=11					Mean ± SEM of column A	60.53 ± 4.155, n=12					Mean ± SEM of column A	60.53 ± 4.155, n=12					Mean ± SEM of column A	60.53 ± 4.155, n=12				Mean ± SEM of column A	60.53 ± 4.155, n=12					Mean ± SEM of column A	60.53 ± 4.155, n=12
Mean ± SEM of column C	77.8 ± 2.44, n=16					Mean ± SEM of column C	77.8 ± 2.44, n=16					Mean ± SEM of column D	63.91 ± 5.112, n=10					Mean ± SEM of column E	7.764 ± 7.337, n=9					Mean ± SEM of column E	7.764 ± 7.337, n=9				Mean ± SEM of column F	25.51 ± 6.022, n=16					Mean ± SEM of column G	32.89 ± 7.887, n=12
Difference between means	17.27 ± 4.561					Difference between means	12.95 ± 4.996					Difference between means	3.379 ± 6.516					Difference between means	-52.76 ± 7.937					Difference between means	-52.76 ± 7.937				Difference between means	-35.02 ± 7.848					Difference between means	-27.64 ± 8.914
95% confidence interval	7.896 to 26.65					95% confidence interval	2.666 to 23.24					95% confidence interval	-10.21 to 16.97					95% confidence interval	-69.38 to -36.15					95% confidence interval	-69.38 to -36.15				95% confidence interval	-51.15 to -18.89					95% confidence interval	-46.12 to -9.147
R squared (eta squared)	0.3555					R squared (eta squared)	0.212					R squared (eta squared)	0.01327					R squared (eta squared)	0.6994					R squared (eta squared)	0.6994				R squared (eta squared)	0.4337					R squared (eta squared)	0.304
F test to compare variances						F test to compare variances						F test to compare variances						F test to compare variances						F test to compare variances					F test to compare variances						F test to compare variances
F, DFn, Dfd	2.175, 11, 15					F, DFn, Dfd	2.768, 10, 15					F, DFn, Dfd	1.262, 9, 11					F, DFn, Dfd	2.338, 8, 11					F, DFn, Dfd	2.338, 8, 11				F, DFn, Dfd	2.8, 15, 11					F, DFn, Dfd	3.603, 11, 11
P value	0.1625					P value	0.0735					P value	0.7048					P value	0.1924					P value	0.1924				P value	0.0908					P value	0.044
P value summary	ns					P value summary	ns					P value summary	ns					P value summary	ns					P value summary	ns				P value summary	ns					P value summary	*
Significantly different (P < 0.05)?	No					Significantly different (P < 0.05)?	No					Significantly different (P < 0.05)?	No					Significantly different (P < 0.05)?	No					Significantly different (P < 0.05)?	No				Significantly different (P < 0.05)?	No					Significantly different (P < 0.05)?	Yes
