# Supplementary material for: Emergence of social cluster by collective pairwise encounters in Drosophila
Source: eLife journal article supplement (doi:10.7554/elife.51921), 2020-01-20
Supplement: supp [file Figure 7-figure supplement 1C-Source Data.xlsx]

## Sheet: Figure 7-figure-S1C-Source Data
CSxUAS-TNT	CSxppk-GAL4	iav-GAL4xUAS-TNT	nan-GAL4xUAS-TNT	nompc-GAL4xGAL80ts;TNT	piezo-GAL4;cha-GAL80xUAS-TNT
55.6	48.06	-29.63	71.15	28.3	-2.04
35.24	67.14	-36.54	79.17	34.62	10
34.64	74.51	-16	-18.87	-14	3.85
67.92	40.75	26.92	33.96	54.55	2.08
46.29	64	-36.54	44.68	7.14	5.88
83.56	50	11.63	47.06	4.26	-1.92
62.36	68	20.41	17.31	4.35	-1.92
50	51.54	-31.37	-26	-6.52	28.81
39.7	95.35	5.88	23.08	2.17	17.95
64.9	44.26	3.85	-8	20.41	-21.05
55	61.9	21.57	33.33	48.89	24.44
68.72	44.96		9.26	-7.32	33.33
89.7	78.26		-1.96		14.29
75.69	56.15		36.54		-10.2
46.32	52.94				10.2
	52.55				25
					-18.37
					10.2
					-52.27
					6.25
					34
					-16.67

## Sheet: Figure 7-S1C-Summary statistics
Table Analyzed	SSI__mech_inactivation			Table Analyzed	SSI__mech_inactivation			Table Analyzed	SSI__mech_inactivation			Table Analyzed	SSI__mech_inactivation			Table Analyzed	SSI__mech_inactivation
Column C	iav-GAL4xUAS-TNT			Column D	nan-GAL4xUAS-TNT			Column E	nompc-GAL4xGAL80ts;TNT			Column F	piezo-GAL4;cha-GAL80xUAS-TNT			Column B	CSxppk-GAL4
vs.	vs.			vs.	vs.			vs.	vs.			vs.	vs.			vs.	vs.
Column A	CSxUAS-TNT			Column A	CSxUAS-TNT			Column A	CSxUAS-TNT			Column A	CSxUAS-TNT			Column A	CSxUAS-TNT
Unpaired t test				Unpaired t test				Unpaired t test				Unpaired t test				Unpaired t test
P value	<0.0001			P value	0.0011			P value	<0.0001			P value	<0.0001			P value	0.858
P value summary	****			P value summary	**			P value summary	****			P value summary	****			P value summary	ns
Significantly different (P < 0.05)?	Yes			Significantly different (P < 0.05)?	Yes			Significantly different (P < 0.05)?	Yes			Significantly different (P < 0.05)?	Yes			Significantly different (P < 0.05)?	No
One- or two-tailed P value?	Two-tailed			One- or two-tailed P value?	Two-tailed			One- or two-tailed P value?	Two-tailed			One- or two-tailed P value?	Two-tailed			One- or two-tailed P value?	Two-tailed
t, df	t=7.777 df=24			t, df	t=3.665 df=27			t, df	t=5.762 df=25			t, df	t=8.715 df=29			t, df	t=0.1805 df=29
How big is the difference?				How big is the difference?				How big is the difference?				How big is the difference?				How big is the difference?
Mean ± SEM of column A	58.38 ± 4.364, n=15			Mean ± SEM of column A	58.38 ± 4.364, n=15			Mean ± SEM of column A	58.38 ± 4.364, n=15			Mean ± SEM of column A	58.38 ± 4.364, n=15			Mean ± SEM of column A	58.38 ± 4.364, n=15
Mean ± SEM of column C	-5.438 ± 7.54, n=11			Mean ± SEM of column D	24.34 ± 8.408, n=14			Mean ± SEM of column E	14.74 ± 6.49, n=12			Mean ± SEM of column F	8.669 ± 3.71, n=16			Mean ± SEM of column B	59.4 ± 3.652, n=16
Difference between means	-63.81 ± 8.205			Difference between means	-34.04 ± 9.288			Difference between means	-43.64 ± 7.574			Difference between means	-49.71 ± 5.704			Difference between means	1.022 ± 5.663
95% confidence interval	-80.75 to -46.88			95% confidence interval	-53.1 to -14.98			95% confidence interval	-59.24 to -28.04			95% confidence interval	-61.37 to -38.04			95% confidence interval	-10.56 to 12.61
R squared (eta squared)	0.7159			R squared (eta squared)	0.3322			R squared (eta squared)	0.5704			R squared (eta squared)	0.7237			R squared (eta squared)	0.001122
F test to compare variances				F test to compare variances				F test to compare variances				F test to compare variances				F test to compare variances
F, DFn, Dfd	2.189, 10, 14			F, DFn, Dfd	3.464, 13, 14			F, DFn, Dfd	1.769, 11, 14			F, DFn, Dfd	1.297, 14, 15			F, DFn, Dfd	1.339, 14, 15
P value	0.1754			P value	0.0281			P value	0.3129			P value	0.6221			P value	0.5812
P value summary	ns			P value summary	*			P value summary	ns			P value summary	ns			P value summary	ns
Significantly different (P < 0.05)?	No			Significantly different (P < 0.05)?	Yes			Significantly different (P < 0.05)?	No			Significantly different (P < 0.05)?	No			Significantly different (P < 0.05)?	No
