# Supplementary material for: Emergence of social cluster by collective pairwise encounters in Drosophila
Source: eLife journal article supplement (doi:10.7554/elife.51921), 2020-01-20
Supplement: supp [file Figure 7-figure supplement 1D-Source Data.xlsx]

## Sheet: Figure 7-figure-S1D-Source Data
CSxUAS-TNT	CSxppk-GAL4	ppk-GAL4xUAS-TNT	iav-GAL4xUAS-TNT	nan-GAL4xUAS-TNT	nompc-GAL4xGAL80ts;TNT	piezo-GAL4;cha-GAL80xUAS-TNT
36.54	48.95	8	28	38.78	27.03	16
38.3	79.07	2	22.64	68.25	7.32	59.09
34.69	66.67	-2	33.33	5.71	32.43	33.33
64.78	53.72	52.94	28	66	54.35	30.23
50	52.73	17	27.27	56.36	3.23	24.07
52.83	83.85	36	-17.31	57.14	44	45.1
72.22	65.37	8	9.8	38.78	46.34	-9.09
68	68.89	-4	14.81	16.67	8.89	23
65.52	67.76	-14	16.33	52.94	36.36	17
38.78	57.76	-20		24	-2.5	20
82	81.25	20		12	11.76
45.83	75.35	-25		20.41	34.62
				4	-25.81
				35.29
				37.5

## Sheet: Figure 7-S1D-Summary statistics
Table Analyzed	SSI_Mechano_neuron_inactivation_male		Table Analyzed	SSI_Mechano_neuron_inactivation_male		Table Analyzed	SSI_Mechano_neuron_inactivation_male		Table Analyzed	SSI_Mechano_neuron_inactivation_male		Table Analyzed	SSI_Mechano_neuron_inactivation_male		Table Analyzed	SSI_Mechano_neuron_inactivation_male
Column C	ppk-GAL4xUAS-TNT		Column C	ppk-GAL4xUAS-TNT		Column D	iav-GAL4xUAS-TNT		Column E	nan-GAL4xUAS-TNT		Column F	nompc-GAL4xGAL80ts;TNT		Column G	piezo-GAL4;cha-GAL80xUAS-TNT
vs.	vs.		vs.	vs.		vs.	vs.		vs.	vs.		vs.	vs.		vs.	vs.
Column A	CSxUAS-TNT		Column B	CSxppk-GAL4		Column A	CSxUAS-TNT		Column A	CSxUAS-TNT		Column A	CSxUAS-TNT		Column A	CSxUAS-TNT
Unpaired t test			Unpaired t test			Unpaired t test			Unpaired t test			Unpaired t test			Unpaired t test
P value	<0.0001		P value	<0.0001		P value	<0.0001		P value	0.0195		P value	0.0004		P value	0.0009
P value summary	****		P value summary	****		P value summary	****		P value summary	*		P value summary	***		P value summary	***
Significantly different (P < 0.05)?	Yes		Significantly different (P < 0.05)?	Yes		Significantly different (P < 0.05)?	Yes		Significantly different (P < 0.05)?	Yes		Significantly different (P < 0.05)?	Yes		Significantly different (P < 0.05)?	Yes
One- or two-tailed P value?	Two-tailed		One- or two-tailed P value?	Two-tailed		One- or two-tailed P value?	Two-tailed		One- or two-tailed P value?	Two-tailed		One- or two-tailed P value?	Two-tailed		One- or two-tailed P value?	Two-tailed
t, df	t=5.945 df=22		t, df	t=8.185 df=22		t, df	t=5.211 df=19		t, df	t=2.497 df=25		t, df	t=4.1 df=23		t, df	t=3.877 df=20
How big is the difference?			How big is the difference?			How big is the difference?			How big is the difference?			How big is the difference?			How big is the difference?
Mean ± SEM of column A	54.12 ± 4.606, n=12		Mean ± SEM of column B	66.78 ± 3.371, n=12		Mean ± SEM of column A	54.12 ± 4.606, n=12		Mean ± SEM of column A	54.12 ± 4.606, n=12		Mean ± SEM of column A	54.12 ± 4.606, n=12		Mean ± SEM of column A	54.12 ± 4.606, n=12
Mean ± SEM of column C	6.578 ± 6.537, n=12		Mean ± SEM of column C	6.578 ± 6.537, n=12		Mean ± SEM of column D	18.1 ± 5.095, n=9		Mean ± SEM of column E	35.59 ± 5.513, n=15		Mean ± SEM of column F	21.39 ± 6.379, n=13		Mean ± SEM of column G	25.87 ± 5.766, n=10
Difference between means	-47.55 ± 7.997		Difference between means	-60.2 ± 7.355		Difference between means	-36.03 ± 6.913		Difference between means	-18.54 ± 7.423		Difference between means	-32.74 ± 7.984		Difference between means	-28.25 ± 7.287
95% confidence interval	-64.13 to -30.96		95% confidence interval	-75.46 to -44.95		95% confidence interval	-50.5 to -21.56		95% confidence interval	-33.82 to -3.248		95% confidence interval	-49.25 to -16.22		95% confidence interval	-43.45 to -13.05
R squared (eta squared)	0.6164		R squared (eta squared)	0.7528		R squared (eta squared)	0.5884		R squared (eta squared)	0.1996		R squared (eta squared)	0.4223		R squared (eta squared)	0.4291
F test to compare variances			F test to compare variances			F test to compare variances			F test to compare variances			F test to compare variances			F test to compare variances
F, DFn, Dfd	2.014, 11, 11		F, DFn, Dfd	3.761, 11, 11		F, DFn, Dfd	1.09, 11, 8		F, DFn, Dfd	1.791, 14, 11		F, DFn, Dfd	2.078, 12, 11		F, DFn, Dfd	1.306, 9, 11
P value	0.2609		P value	0.0377		P value	0.9269		P value	0.3365		P value	0.2362		P value	0.6657
P value summary	ns		P value summary	*		P value summary	ns		P value summary	ns		P value summary	ns		P value summary	ns
Significantly different (P < 0.05)?	No		Significantly different (P < 0.05)?	Yes		Significantly different (P < 0.05)?	No		Significantly different (P < 0.05)?	No		Significantly different (P < 0.05)?	No		Significantly different (P < 0.05)?	No
