# Supplementary material for: Emergence of social cluster by collective pairwise encounters in Drosophila
Source: eLife journal article supplement (doi:10.7554/elife.51921), 2020-01-20
Supplement: supp [file Figure 7D-Source Data.xlsx]

## Sheet: Figure 7D-Source Data
CS X UAS-CsChrimson	CS X ppk-GAL4	ppk-GAL4 X UAS-CsChrimson
44.68	60.75	83.87
40.48	90.38	78.05
49.51	60	81.4
39.79	56	72.09
45.24	70.73	83.9
52.22	84.62	86.67
29.79	45.65	59.38
65.57	60.71	95.45
40.48	77.14	75.56
65.57	74.51	86.67
45.24	80.77	88.52
28.85	64	76.19
49.12	50	82.98
74.51	68	56.9876
31.25	61.54	66.5572
36.73	42.31	97.5

## Sheet: Figure 7D Summary statistics
Table Analyzed	SSI_ppk_neuron_activation					Table Analyzed	SSI_ppk_neuron_activation
Column C	ppk-GAL4 X UAS-CsChrimson					Column C	ppk-GAL4 X UAS-CsChrimson
vs.	vs.					vs.	vs.
Column A	CS X UAS-CsChrimson					Column B	CS X ppk-GAL4
Unpaired t test						Unpaired t test
P value	<0.0001					P value	0.0038
P value summary	****					P value summary	**
Significantly different (P < 0.05)?	Yes					Significantly different (P < 0.05)?	Yes
One- or two-tailed P value?	Two-tailed					One- or two-tailed P value?	Two-tailed
t, df	t=7.621 df=30					t, df	t=3.139 df=30
How big is the difference?						How big is the difference?
Mean ± SEM of column A	46.19 ± 3.293, n=16					Mean ± SEM of column B	65.44 ± 3.43, n=16
Mean ± SEM of column C	79.49 ± 2.872, n=16					Mean ± SEM of column C	79.49 ± 2.872, n=16
Difference between means	33.3 ± 4.369					Difference between means	14.04 ± 4.474
95% confidence interval	24.37 to 42.22					95% confidence interval	4.905 to 23.18
R squared (eta squared)	0.6594					R squared (eta squared)	0.2472
F test to compare variances						F test to compare variances
F, DFn, Dfd	1.314, 15, 15					F, DFn, Dfd	1.427, 15, 15
P value	0.6031					P value	0.4996
P value summary	ns					P value summary	ns
Significantly different (P < 0.05)?	No					Significantly different (P < 0.05)?	No
