# Supplementary material for: Emergence of social cluster by collective pairwise encounters in Drosophila
Source: eLife journal article supplement (doi:10.7554/elife.51921), 2020-01-20
Supplement: supp [file Figure 7E-Source Data.xlsx]

## Sheet: Figure 7E-Source Data
CS X UAS-TNT	CS X ppk-GAL4	ppk-GAL4 X UAS-TNT
45.1	61.54	50
25.64	95.35	25
44.44	42.31	38
57.69	61.9	26.42
36.73	84.21	19.64
33.96	78.26	62.5
32.26	96.15	17.55
42	52.94	15.09
42	72.55	7.84
54.55	70.83	32
65	78.72	8
78.9603	83.33	23.33

## Sheet: Figure 7E Summary statistics
Table Analyzed	ppk-GAL4 inactivation				Table Analyzed	ppk-GAL4 inactivation
Column C	ppk-GAL4 X UAS-TNT				Column C	ppk-GAL4 X UAS-TNT
vs.	vs.				vs.	vs.
Column A	CS X UAS-TNT				Column B	CS X ppk-GAL4
Unpaired t test					Unpaired t test
P value	0.0064				P value	<0.0001
P value summary	**				P value summary	****
Significantly different (P < 0.05)?	Yes				Significantly different (P < 0.05)?	Yes
One- or two-tailed P value?	Two-tailed				One- or two-tailed P value?	Two-tailed
t, df	t=3.01 df=22				t, df	t=6.891 df=22
How big is the difference?					How big is the difference?
Mean ± SEM of column A	46.53 ± 4.372, n=12				Mean ± SEM of column B	73.17 ± 4.713, n=12
Mean ± SEM of column C	27.11 ± 4.74, n=12				Mean ± SEM of column C	27.11 ± 4.74, n=12
Difference between means	-19.41 ± 6.449				Difference between means	-46.06 ± 6.684
95% confidence interval	-32.79 to -6.039				95% confidence interval	-59.92 to -32.2
R squared (eta squared)	0.2917				R squared (eta squared)	0.6834
F test to compare variances					F test to compare variances
F, DFn, Dfd	1.176, 11, 11				F, DFn, Dfd	1.012, 11, 11
P value	0.7932				P value	0.9848
P value summary	ns				P value summary	ns
Significantly different (P < 0.05)?	No				Significantly different (P < 0.05)?	No
