# Supplementary material for: Emergence of social cluster by collective pairwise encounters in Drosophila
Source: eLife journal article supplement (doi:10.7554/elife.51921), 2020-01-20
Supplement: supp [file Figure 7F-Source Data.xlsx]

## Sheet: Sheet1
	ppk-GAL4 X UAS-CsChrimson										CS
1 min	0	0	0	0	0	0	0	0			0	0	0	0	0	0	0	0
2 min	5	8	10	8	10	7	8	9			0	0	0	0	0	0	0	0
3 min	15	13	16	18	20	16	14	15			6	8	8	8	6	8	7	0
4 min	30	22	24	23	20	18	20	16			10	12	15	18	14	12	8	5
5 min	35	30	26	27	25	20	28	20			13	18	20	20	21	16	15	10
6 min	41	39	30	31	35	24	30	30			17	22	28	25	21	20	18	15
7 min	42	39	36	32	35	28	33	32			20	25	30	27	22	18	20	16
8 min	42	39	41	38	37	30	38	33			20	32	35	27	23	23	20	18
9 min	42	41	42	40	42	33	39	35			25	37	37	35	25	27	23	18
10 min	42	43	42	40	45	40	40	36			30	37	38	36	25	32	23	21
11 min	42	44	42	42	46	40	44	41			31	42	39	38	26	35	29	21
12 min	42	44	42	42	45	41	45	41			35	45	41	38	30	35	31	32
13 min	42	43	42	44	47	41	45	41			35	46	45	40	35	38	32	35
14 min	45	45	42	45	44	42	45	44			35	47	46	43	34	38	34	35
15 min	47	46	45	44	48	42	45	44			35	47	47	45	35	40	35	35
16 min	47	48	47	45	48	43	45	45			39	48	47	45	36	40	35	37
17 min	48	48	47	48	48	45	45	45			40	48	46	46	39	41	39	39
18 min	48	47	48	48	47	45	45	45			40	48	46	46	44	46	42	40
19 min	48	48	49	48	46	45	45	46			42	48	46	47	45	48	42	41
20 min	47	48	48	48	49	45	45	45			44	48	48	47	46	48	45	45
30 min	48	48	45	49	48	46	45	45			48	49	46	47	46	48	47	46
