# Supplementary material for: Emergence of social cluster by collective pairwise encounters in Drosophila
Source: eLife journal article supplement (doi:10.7554/elife.51921), 2020-01-20
Supplement: supp [file Figure 7G-Source Data.xlsx]

## Sheet: Figure 7G-Source Data
CS X UAS-CsChrimson	CS X ppk-GAL4	ppk-GAL4 X UAS-CsChrimson
3.41192	8.14168	4.37373
6.29664	6.62596	5.67248
3.46144	6.31164	6.10307
6.99344	4.25834	5.91916
6.4955	6.06122	5.32136
4.62838	3.12358	6.92251
4.7227	8.8521	8.26637
2.71672	8.6827	5.21886
4.5269	6.07258	4.36691
5.66552	6.90794	3.12882
5.56862	3.2485	4.20411
2.87028	4.51532	5.40313
3.61523	3.88588	4.44958
4.01108	5.71144	6.56431
6.56164	4.42374	4.91168
4.6279	3.60469	5.80231
5.39409	4.91708	6.03407
4.91505	5.7963	4.71054
3.54389	4.59938	3.93301
6.8455	4.76666	7.26435
3.45164	4.92072	5.75369
5.82306	6.42058	4.30769
6.14974	5.29114	5.06421
3.53358	6.23586	4.94637
6.00938	7.26254	6.76501
3.94322	5.12136	2.72956
6.97816	6.68736	3.05154
2.93184	4.2368	4.4622
6.17522	6.7161	5.81343
	3.42808

## Sheet: Figure 7G Summary statistics
Table Analyzed	Data 1			Table Analyzed	Data 1
Column C	ppk-GAL4 x CsChrimson			Column C	ppk-GAL4 x CsChrimson
vs.	vs.			vs.	vs.
Column A	CS x CsChrimson			Column B	CS x ppk-GAL4
Unpaired t test				Unpaired t test
P value	0.3459			P value	0.3638
P value summary	ns			P value summary	ns
Significantly different (P < 0.05)?	No			Significantly different (P < 0.05)?	No
One- or two-tailed P value?	Two-tailed			One- or two-tailed P value?	Two-tailed
t, df	t=0.9506 df=56			t, df	t=0.9156 df=57
How big is the difference?				How big is the difference?
Mean ± SEM of column A	4.892 ± 0.255, n=29			Mean ± SEM of column B	5.561 ± 0.2816, n=30
Mean ± SEM of column C	5.223 ± 0.2369, n=29			Mean ± SEM of column C	5.223 ± 0.2369, n=29
Difference between means	0.3309 ± 0.3481			Difference between means	-0.338 ± 0.3692
95% confidence interval	-0.3664 to 1.028			95% confidence interval	-1.077 to 0.4013
R squared (eta squared)	0.01588			R squared (eta squared)	0.01449
F test to compare variances				F test to compare variances
F, DFn, Dfd	1.159, 28, 28			F, DFn, Dfd	1.462, 29, 28
P value	0.6991			P value	0.3184
P value summary	ns			P value summary	ns
Significantly different (P < 0.05)?	No			Significantly different (P < 0.05)?	No
