# Supplementary material for: Emergence of social cluster by collective pairwise encounters in Drosophila
Source: eLife journal article supplement (doi:10.7554/elife.51921), 2020-01-20
Supplement: supp [file Figure 8C-Source Data.xlsx]

## Sheet: Figure 8C-Source Data
Single	Group	Re-grouped
0.615	1.3948	1.3
0.871	1.4	1.5
0.678	1.4	0.9
0.452	0.86	0.87
0.558	1.8	1.06
0.449	1.38	1.57
0.781	1.39	1
0.667	2.26	1.69

## Sheet: Figure 8C Summary statistics
Table Analyzed	CaLexA_leg			Table Analyzed	CaLexA_leg			Table Analyzed	CaLexA_leg
Column B	Group			Column C	Re-grouped			Column C	Re-grouped
vs.	vs.			vs.	vs.			vs.	vs.
Column A	Single			Column A	Single			Column B	Group
Unpaired t test				Unpaired t test				Unpaired t test
P value	<0.0001			P value	0.0003			P value	0.1926
P value summary	****			P value summary	***			P value summary	ns
Significantly different (P < 0.05)?	Yes			Significantly different (P < 0.05)?	Yes			Significantly different (P < 0.05)?	No
One- or two-tailed P value?	Two-tailed			One- or two-tailed P value?	Two-tailed			One- or two-tailed P value?	Two-tailed
t, df	t=5.617 df=14			t, df	t=4.807 df=14			t, df	t=1.369 df=14
How big is the difference?				How big is the difference?				How big is the difference?
Mean ± SEM of column A	0.6339 ± 0.05249, n=8			Mean ± SEM of column A	0.6339 ± 0.05249, n=8			Mean ± SEM of column B	1.486 ± 0.1422, n=8
Mean ± SEM of column B	1.486 ± 0.1422, n=8			Mean ± SEM of column C	1.236 ± 0.1138, n=8			Mean ± SEM of column C	1.236 ± 0.1138, n=8
Difference between means	0.8517 ± 0.1516			Difference between means	0.6024 ± 0.1253			Difference between means	-0.2494 ± 0.1822
95% confidence interval	0.5265 to 1.177			95% confidence interval	0.3336 to 0.8711			95% confidence interval	-0.64 to 0.1413
R squared (eta squared)	0.6927			R squared (eta squared)	0.6227			R squared (eta squared)	0.118
F test to compare variances				F test to compare variances				F test to compare variances
F, DFn, Dfd	7.344, 7, 7			F, DFn, Dfd	4.699, 7, 7			F, DFn, Dfd	1.563, 7, 7
P value	0.0174			P value	0.0586			P value	0.5701
P value summary	*			P value summary	ns			P value summary	ns
Significantly different (P < 0.05)?	Yes			Significantly different (P < 0.05)?	No			Significantly different (P < 0.05)?	No
