# Supplementary material for: Emergence of social cluster by collective pairwise encounters in Drosophila
Source: eLife journal article supplement (doi:10.7554/elife.51921), 2020-01-20
Supplement: supp [file Figure 8E-Source Data.xlsx]

## Sheet: Figure 8E-Source Data
Single	Netted single	Netted group	Re-grouped
0.899276	0.453752	0.527853	1.06125
0.537683	0.604808	0.851855	0.725645
0.416476	0.465687	0.755868	0.669656
0.576905	0.272363	0.385446	0.476517
0.429354	0.53111	0.451489	0.782813
0.467148	0.630131	0.285906	0.427392
0.800937	0.502241	0.389434	0.812189
0.687264	1.03132	0.446962	1.09564
0.373803	0.640953	0.73772	1.72412
0.358348	0.547521		0.687718
0.507341
0.505436
0.399632
0.386364
0.45406
0.551579

## Sheet: Figure 8E Summary statistics
Table Analyzed	CaLexA_Net
Data sets analyzed	A : Single	B : Netted single	C : Netted group	D : Re-grouped
ANOVA summary
F	4.478
P value	0.0083
P value summary	**
Significant diff. among means (P < 0.05)?	Yes
R square	0.2468
Brown-Forsythe test
F (DFn, DFd)	1.37 (3, 41)
P value	0.2653
P value summary	ns
Are SDs significantly different (P < 0.05)?	No
Bartlett's test
Bartlett's statistic (corrected)	10.07
P value	0.018
P value summary	*
Are SDs significantly different (P < 0.05)?	Yes
ANOVA table	SS	DF	MS	F (DFn, DFd)	P value
Treatment (between columns)	0.7477	3	0.2492	F (3, 41) = 4.478	P=0.0083
Residual (within columns)	2.282	41	0.05565
Total	3.029	44
Data summary
Number of treatments (columns)	4
Number of values (total)	45
Number of families	1
Number of comparisons per family	6
Alpha	0.05
Tukey's multiple comparisons test	Mean Diff.	95.00% CI of diff.	Significant?	Summary	Adjusted P Value
Single vs. Netted single	-0.04601	-0.3006 to 0.2086	No	ns	0.9623	A-B
Single vs. Netted group	-0.01497	-0.2782 to 0.2482	No	ns	0.9987	A-C
Single vs. Re-grouped	-0.3243	-0.5789 to -0.06969	Yes	**	0.0077	A-D
Netted single vs. Netted group	0.03104	-0.2592 to 0.3213	No	ns	0.9917	B-C
Netted single vs. Re-grouped	-0.2783	-0.5608 to 0.004181	No	ns	0.0548	B-D
Netted group vs. Re-grouped	-0.3093	-0.5996 to -0.01912	Yes	*	0.0328	C-D
Test details	Mean 1	Mean 2	Mean Diff.	SE of diff.	n1	n2	q	DF
Single vs. Netted single	0.522	0.568	-0.04601	0.0951	16	10	0.6843	41
Single vs. Netted group	0.522	0.5369	-0.01497	0.09829	16	9	0.2154	41
Single vs. Re-grouped	0.522	0.8463	-0.3243	0.0951	16	10	4.823	41
Netted single vs. Netted group	0.568	0.5369	0.03104	0.1084	10	9	0.405	41
Netted single vs. Re-grouped	0.568	0.8463	-0.2783	0.1055	10	10	3.731	41
Netted group vs. Re-grouped	0.5369	0.8463	-0.3093	0.1084	9	10	4.036	41
