# Supplementary material for: Emergence of social cluster by collective pairwise encounters in Drosophila
Source: eLife journal article supplement (doi:10.7554/elife.51921), 2020-01-20
Supplement: supp [file Source Data_Figure 2-figure supplement 4C.xlsx]

## Sheet: Sheet1
Figure 2-figure supplement 4C
Female	0-25	1.1243	2.0599	0.9411	1.408	1.0889	0.899	0.9304	1.4208	2.0952	0.8674	0.8165	1.1037	2.0356	1.4378	0.8316	1.3433	1.0001	1.2834	1.338	0.9306	0.7686	1.531	1.2255	1.5894	0.8567	1.0619	1.1546	0.7013	1.2009	0.9488
Male		1.1284	1.5932	1.093	0.9238	1.3809	1.0953	0.9428	1.0343	1.0045	1.982	2.1632	1.2611	1.2181	1.0588	1.3724	1.0328	1.2266	0.9554	1.6776	1.2938	0.9314	0.8475	1.1316	1.1233	1.1123	1.6666	0.9269	1.1843	1.1067	1.7147	1.0321	1.1216	1.1722	1.9248	1.426
Random Female		2.8755	3.1338	2.3854	3.4012	2.2841	3.2393	3.4489	2.7685	2.9263	2.7465	2.8103	3.5357	2.55	3.0684	2.081	3.1685	3.7867	2.7483	3.652	3.5902	2.6281	2.5397	3.2611	2.2463	2.6934	3.408	3.8641	2.7962	2.7832	2.4586	2.7545	2.3179	2.2966	2.4132	3.1456	2.4623	2.9345	2.6585	4.2292	2.2093
Random Male		3.9604	2.7405	2.4595	3.1758	2.3658	2.9434	3.2527	3.4883	2.5875	2.6132	2.3068	3.2337	2.2968	2.9847	2.9115	3.6457	2.7513	2.5588	2.5015	2.6434	2.6115	3.612	2.9204	3.8668	2.7403	2.3932	2.4499	2.4401	3.1675	2.2982	3.3093	2.7376	3.2871	2.8854	3.3526	2.8015	2.7354	2.2159	3.2701	2.4319	2.4425
Female	0-75	1.915	2.7816	1.2507	1.6433	1.3358	1.125	1.0976	2.3589	4.5765	1.0602	1.0527	1.606	2.4387	1.9961	1.0881	1.6503	1.3172	1.5678	1.8484	1.1582	0.8887	1.9796	1.6701	1.9709	1.1635	1.4041	1.5524	0.8673	1.4886	1.3564
Male		1.4028	1.8543	1.293	1.2192	1.6685	1.2777	1.1795	1.4943	1.2176	2.6627	3.442	1.5009	1.5356	1.3873	1.5793	1.2901	1.4687	1.2753	2.7669	1.5992	1.0824	1.149	1.4173	1.5777	1.3794	2.1229	1.1733	1.3874	1.5052	2.7278	1.376	1.7346	1.817	2.7156	1.7279
Random Female		3.3977	4.078	2.94	3.7715	2.9113	3.973	4.2028	3.4836	3.5754	3.2242	3.3614	4.1241	3.5199	3.851	2.7253	3.9018	4.4386	3.4263	4.71	4.4683	3.4827	2.974	4.1352	3.0098	3.2038	4.1486	4.7372	3.4941	3.6512	2.839	3.4984	2.8504	3.0171	3.7127	3.8578	3.0492	3.3947	3.3996	4.7305	2.7577
Random Male		4.8531	4.0393	3.2923	3.8764	2.8686	3.4528	3.7336	5.2321	3.5561	3.3467	2.6982	4.1691	3.2954	3.5617	3.4954	4.2667	4.0217	3.372	3.0457	3.0911	3.1603	4.2494	3.9784	5.0542	3.4748	2.8939	2.958	2.8659	3.9385	2.6897	3.9478	3.1557	3.8289	3.5671	3.8799	3.4642	3.6502	2.6469	3.8144	3.0961	2.885
Female	25-75	2.4802	3.3639	1.4662	1.9175	1.5922	1.3628	1.2738	2.9571	6.112	1.2479	1.2888	2.0057	2.8203	2.4683	1.3017	2.0531	1.6106	1.8832	2.2566	1.3661	1.0107	2.3659	2.085	2.3779	1.3799	1.732	1.8622	1.0432	1.7638	1.6697
Male		1.6431	2.1457	1.4963	1.4702	1.9101	1.4837	1.4148	1.9142	1.3925	3.2598	4.4859	1.7617	1.7975	1.6793	1.785	1.5334	1.7186	1.6034	3.4534	1.8716	1.2316	1.3841	1.706	1.8988	1.6502	2.5934	1.4129	1.5953	1.8461	3.4325	1.6879	2.0548	2.3435	3.4364	2.1392
Random Female		4.0073	4.8924	3.5345	4.1486	3.6568	4.596	5.0116	4.1937	4.3577	3.875	3.8728	4.6996	4.3581	4.5407	3.172	4.5047	5.2229	3.9743	5.7693	5.3136	4.2833	3.3815	5.06	3.645	3.8226	4.8192	5.5075	4.1731	4.3657	3.2998	4.2005	3.3594	3.5926	4.6525	4.3874	3.6479	3.9233	4.0036	5.2864	3.2565
Random Male		5.4481	5.0553	4.0083	4.6672	3.4557	3.9755	4.2943	6.6986	4.376	4.0982	3.2482	5.0424	4.0365	4.0528	3.996	5.074	5.0476	4.1253	3.4326	3.5642	3.9474	5.09	5.1908	6.3315	4.1542	3.4388	3.3937	3.2819	4.7374	3.1048	4.6246	3.6518	4.5645	4.1988	4.5077	4.2645	4.5043	3.0566	4.3663	3.6061	3.1728
